1 **Enhancer transcription identifies *cis*-regulatory elements for photoreceptor cell**  
2 **types**

3  
4  
5

6 Rangarajan D. Nadadur<sup>1\*</sup>, Carlos Perez-Cervantes<sup>1\*</sup>, Nicolas Lonfat<sup>2\*</sup>, Linsin A.

7 Smith<sup>1\*</sup>, Andrew E. O. Hughes<sup>3</sup>, Sui Wang<sup>2,4</sup>, Joseph C. Corbo<sup>3</sup>, Connie Cepko<sup>2</sup>, Ivan

8 P. Moskowitz<sup>1</sup>

9

10 \*Contributed equally

11

12

13 **Affiliations:**

14 <sup>1</sup>Departments of Pediatrics, Pathology, and Human Genetics, University of Chicago,  
15 Chicago, IL, USA

16 <sup>2</sup> Departments of Genetics and Ophthalmology, Howard Hughes Medical Institute,  
17 Harvard Medical School, Boston, MA 02115, USA.

18 Electronic address: cepko@genetics.med.harvard.edu.

19 <sup>3</sup> Department of Pathology and Immunology, Washington University School of Medicine,  
20 St. Louis, Missouri 63110, USA

21 <sup>4</sup> Current address: Department of Ophthalmology, Stanford University, Stanford, CA  
22 94305, USA

23

24

25 Key words: *cis*-regulatory element (CRE), enhancer, transcription factor, non-coding  
26 transcriptome, non-coding RNA (ncRNA), long non-coding RNA (lncRNA), chromatin,  
27 gene regulatory network, photoreceptor, Nrl, Otx2, Onecut, rod, cone

28

29

30 Please send correspondence to:

31 Ivan Moskowitz, M.D., Ph.D.

32 Departments of Pediatrics, Pathology, and Human Genetics

33 The University of Chicago

34 900 East 57<sup>th</sup> Street, KCBD Room 5102

35 Chicago, Illinois 60637

36 Phone: 773/834-0462

37 [imoskowitz@uchicago.edu](mailto:imoskowitz@uchicago.edu)

38

39 **Abstract**

40 Identification of the *cis*-regulatory elements (CREs) that regulate gene expression in  
41 specific cell types is critical for defining the gene regulatory networks (GRNs) that  
42 control normal physiology and disease states. We previously utilized non-coding RNA  
43 (ncRNA) profiling to define CREs that comprise a GRN in the adult mouse heart<sup>1</sup>. Here,  
44 we applied ncRNA profiling to the mouse retina in the presence and absence of *Nrl*, a  
45 rod photoreceptor-specific transcription factor required for rod versus cone  
46 photoreceptor cell fate. Differential expression of *Nrl*-dependent ncRNAs positively  
47 correlated with differential expression of *Nrl*-dependent local genes. Two distinct *Nrl*-  
48 dependent regulatory networks were discerned in parallel: *Nrl*-activated ncRNAs were  
49 enriched for accessible chromatin in rods but not cones whereas *Nrl*-repressed ncRNAs  
50 were enriched for accessible chromatin in cones but not rods. Furthermore, differential  
51 *Nrl*-dependent ncRNA expression levels quantitatively correlated with photoreceptor cell  
52 type-specific ATAC-seq read density. Direct assessment of *Nrl*-dependent ncRNA-  
53 defined loci identified functional cone photoreceptor CREs. This work supports  
54 differential ncRNA profiling as a platform for identifying context-specific regulatory  
55 elements and provides insight into the networks that define photoreceptor cell types.

56

## 57 **Introduction**

58 Identification of tissue and context specific *cis*-regulatory elements (CREs) is critical  
59 to defining the transcriptional networks that govern physiology and disease across  
60 biological contexts. The advent of high-throughput sequencing has allowed for genome-  
61 wide analysis of chromatin state as a proxy for regulatory elements<sup>2</sup>. The use of histone  
62 modifications, chromatin status and transcription factor (TF) occupancy to define gene  
63 regulation has been successful in many contexts<sup>3-6</sup>. However, these approaches lack  
64 both specificity and quantitative resolution of enhancer activity<sup>2</sup>. These observations  
65 indicate the need for complementary strategies for the identification of functional  
66 context-dependent enhancers.

67 A growing body of literature indicates that noncoding RNAs (ncRNAs) are  
68 transcribed from active CREs. The function of these transcripts and their role in gene  
69 regulation is an area of active research<sup>1,7-10</sup>. We previously demonstrated that  
70 differential enhancer transcription can be used to define a gene regulatory network  
71 (GRN)<sup>1</sup>. We identified ncRNAs whose expression was dependent on the cardiac  
72 transcription factor TBX5<sup>1</sup>. These genome wide TBX5-dependent ncRNAs from the  
73 adult mouse atria defined a GRN for cardiac rhythm<sup>1</sup>. This approach led to the  
74 identification of potent regulatory elements in cardiomyocytes and identified functional  
75 ncRNAs that mediated TBX5-dependent gene regulation. These findings suggested that  
76 differential enhancer transcription may be an effective complementary approach to  
77 chromatin accessibility, epigenetic marks, and reporter assays for the discovery of  
78 context-dependent CREs. However, the applicability of this approach across broader

79 contexts and its ability to distinguish activated and repressed elements has not been  
80 examined.

81 Here, we applied the differential ncRNA approach to identify regulatory elements  
82 that are active in either of two specific cell types, rod and cone photoreceptors, in the  
83 mouse retina. Rod photoreceptors are active in dim light and constitute the most  
84 abundant retinal cell type, comprising ~80% of all mouse retinal cells and 95% of human  
85 photoreceptors<sup>11,12</sup>. In contrast, cone photoreceptors are active in bright light and  
86 mediate high-acuity vision and color vision. Their critical role in daylight vision makes  
87 them a desirable cell type to replace from stem cells, or to target for gene therapy, in  
88 diseases that lead to blindness<sup>13</sup>. An understanding of the GRNs that control cone  
89 versus rod fate is essential for understanding both normal retinal biology and for cone  
90 replacement, as has been recently demonstrated for rods in mice<sup>14-19</sup>. In addition, gene  
91 therapy vectors that require expression specifically in rods and/or cones would benefit  
92 from a broader range of validated photoreceptor CREs<sup>20-22</sup>.

93 Rods and cones are produced by retinal progenitor cells (RPCs), with cones  
94 generally produced earlier in development than rods, from RPCs that express the TFs  
95 *Otx2*, *Olig2*, and *Oc1*<sup>23-26</sup>. These and other TFs with essential roles in RPCs, rods, or  
96 cones have been identified<sup>27,28</sup>. In addition to *Otx2*, a close homologue, *Crx*, is required  
97 for normal gene expression in both rods and cones<sup>29-31</sup>. In contrast, *Nrl*, a basic leucine  
98 zipper TF, is expressed only in rods and is required for their formation. In *Nrl*<sup>-/-</sup> mutant  
99 mice, rod photoreceptors fail to form and are instead transformed into cells that  
100 resemble cone photoreceptors in most respects<sup>32</sup>.

101           We aimed to identify the photoreceptor CREs that regulate rod and cone gene  
102 expression programs using differential ncRNA transcriptome analysis. We compared  
103 ncRNA abundance genome-wide in the wild-type versus *Nrl*<sup>-/-</sup> mouse retina. We found  
104 that *Nrl*-activated versus repressed ncRNA transcripts defined photoreceptor regulatory  
105 elements. *Nrl*-activated ncRNAs, predominant in the wild-type retina, identified locations  
106 of accessible chromatin in rods and that were near rod-expressed genes. In contrast,  
107 *Nrl*-repressed ncRNAs, predominant in the *Nrl*<sup>-/-</sup> retina, identified locations of accessible  
108 chromatin in cones that were near cone-expressed genes. Moreover, differential  
109 expression of *Nrl*-dependent ncRNAs and that of local target genes were quantitatively  
110 correlated. Furthermore, the change in expression of these ncRNAs positively  
111 correlated with differential signal from rod and cone ATAC-seq. Direct assessment of  
112 *Nrl*-repressed loci identified active elements for photoreceptor expression, enriched for  
113 cone-specific genes. These data illustrate the utility of differential ncRNA profiling for  
114 nominating TF-dependent and context-specific regulatory elements.

115

116

## 117 **Results**

### 118 ***Nrl*-dependent coding and non-coding transcriptional profiling identifies** 119 **photoreceptor CREs**

120 We interrogated *Nrl*-dependent coding and non-coding transcription in the mouse  
121 retina. We performed mRNA transcriptional profiling to determine *Nrl*-dependent coding  
122 gene expression (Figure 1A). We sequenced cDNA libraries made from polyA+  
123 selected RNA from retinas of litter-matched WT and *Nrl* mutant adult mice at postnatal  
124 day 21 (P21) (*Nrl*<sup>+/+</sup> vs *Nrl*<sup>-/-</sup>, n=5 and n= 6 resp., Figure 1A). By P21, mouse  
125 photoreceptor differentiation is largely complete. Genotype described 98% of the  
126 variance between samples, indicating a specific effect mediated by *Nrl* deletion across  
127 biological replicates (Figure 1B). Differential expression testing revealed 4,315  
128 misregulated genes (Figure 1A). *Nrl* expression was absent from *Nrl*<sup>-/-</sup> samples, along  
129 with numerous known *Nrl* targets and rod-specific genes, including *Rho*, *Gnat1*, and  
130 *Nr2e3*. Conversely, genes whose expression is normally absent in rods, including those  
131 involved in cone differentiation showed activation in *Nrl*<sup>-/-</sup> samples, including *Gnat2*,  
132 *Gngt2*, and *Opn1sw*<sup>18</sup>. These expression changes were consistent with previously  
133 identified *Nrl*-dependent gene expression and rod- versus cone-specific gene  
134 expression patterns in the adult retina<sup>16-18,33,34</sup>.

135 We performed ncRNA transcriptional profiling to identify *Nrl*-dependent ncRNAs.  
136 We performed deep sequencing of non-polyadenylated RNA from the same control and  
137 *Nrl* mutant retinal samples described above (Figure 1C)<sup>35</sup>. This approach identified  
138 approximately 30,000 retinal non-coding transcripts by *de novo* transcript assembly  
139 (Supplemental Figure). Approximately 4,657 of these transcripts were *Nrl*-dependent

140 intergenic ncRNAs (FDR<0.05, FC>2). Genotype described 98% of the variance  
141 between samples, indicating a specific effect mediated by *Nrl* deletion (Figure 1D). Of  
142 the 4,657 *NRL*-dependent ncRNAs, 3,112 were significantly downregulated, or *Nrl*-  
143 activated, and 1,545 were significantly upregulated, or *Nrl*-repressed (Figure 1C).

144 We hypothesized that some *Nrl*-dependent noncoding transcripts marked *Nrl*-  
145 dependent retinal enhancers. Active regulatory elements are characterized by  
146 characteristic genomic patterns, including open chromatin<sup>3-5</sup>. To examine the  
147 epigenomic landscape of mouse retinal tissue, we analyzed Assay for Transpose  
148 Accessible Chromatin (ATAC-Seq) data from whole mouse wild-type retinal tissue at  
149 P21 (GSE72550)<sup>19,36,37</sup>. *Nrl*-dependent ncRNAs significantly overlapped with locations  
150 of accessible chromatin in the wild-type retina (Figure 1E, top).

151 We attempted to affiliate *Nrl*-dependent ncRNA-defined regulatory elements with  
152 candidate target *Nrl*-dependent coding genes. We sought *Nrl*-dependent mRNAs within  
153 2MB of the ncRNA locus, a conservative consideration of potential distance parameters  
154 for CREs<sup>1</sup>. We performed Gene Ontology (GO) analysis of the *Nrl*-dependent genes  
155 associated with *Nrl*-dependent ncRNAs. This analysis described enrichment for GO  
156 terms related to phototransduction, sensory perception, and response to light stimulus,  
157 all consistent with photoreceptor gene expression (Figure 1E, bottom).

158 We and others have previously hypothesized that quantitative changes in CRE  
159 transcription mirrors quantitative changes in CRE activity<sup>1,38</sup>. Identification of CREs  
160 using ncRNA transcriptional profiling affords the determination of context-dependent  
161 quantitative changes in CRE transcription. We examined the quantitative correlation  
162 between the change in *Nrl*-dependent ncRNA transcription and the change in the most

163 proximal *Nrl*-dependent gene. First, we observed that the directionality of the change of  
164 each *Nrl*-dependent ncRNA and its local mRNA were significantly concordant.  
165 Secondly, the relative expression of *Nrl*-dependent ncRNAs was positively correlated  
166 with the relative expression of the most proximal *NRL*-dependent gene (Figure 1F  
167  $Cor=0.58$ ,  $P=9.7e-74$ ). Together, these observations indicate a positive quantitative  
168 relationship between enhancer transcription and target gene regulation. Together these  
169 observations indicate that *Nrl*-dependent ncRNA profiling identifies genomic regions  
170 overlapping with open chromatin and that quantitatively correlate with local *Nrl*-  
171 dependent gene expression.

172

173 ***Nrl*-dependent ncRNA transcriptional profiling identifies two distinct gene**  
174 **regulatory signatures, specific to rod and cone photoreceptors**

175 We hypothesized that removal of *Nrl* revealed two distinct regulatory networks: a  
176 pathway driven by *Nrl* in the *wild-type* retina, composed of genes that require *Nrl* directly  
177 or indirectly and are thereby downregulated in *Nrl*<sup>-/-</sup> samples, referred to as *Nrl*-activated  
178 genes; and a pathway that emerged in the *Nrl* mutant retina, composed of genes whose  
179 transcription is directly or indirectly negatively regulated by *Nrl* and are thereby  
180 upregulated in *Nrl*<sup>-/-</sup> samples, referred to as *Nrl*-repressed genes. *NRL* is a well-  
181 described driver of rod differentiation and repressor of cone differentiation<sup>16,32,39-41</sup>. We  
182 therefore hypothesized that *Nrl*-activated ncRNAs, higher in the wild-type retina, would  
183 specifically define CREs active in rods, whereas the *Nrl*-repressed ncRNAs, higher in  
184 the *Nrl* mutant retina, would specifically define CREs active in cones.



185           We attempted to identify candidate rod and cone CREs by comparing *Nrl*-  
186 dependent ncRNAs with open chromatin signatures from rod and cone specific cell  
187 populations (GSE83312)<sup>18</sup>, as opposed to whole retinal tissue (Figure 1E top). We  
188 found that both *Nrl*-activated and *Nrl*-repressed ncRNAs overlap with open chromatin in  
189 both rods and cones (Figure 2A-B, top). However, the *Nrl*-activated ncRNAs showed  
190 much greater enrichment for open chromatin in rods relative to open chromatin in cones  
191 (Figure 2A-B, OR=2.77 vs 2.36). Conversely, *Nrl*-repressed ncRNAs showed much  
192 greater enrichment with cone open chromatin than with rod open chromatin (Figure 2A-  
193 B, OR = 5.15 vs 3.35). We interrogated the distribution of activated and repressed *Nrl*-  
194 dependent ncRNAs with chromatin accessibility to define rod-specific, cone-specific,  
195 and shared CREs. By overlapping rod and cone ATAC-seq sets, we identified total  
196 regions of accessible chromatin, of which 25,666 were shared between rods and cones,  
197 9,116 were rod-specific, and 9,148 were cone-specific (Figure 2C). Intersection of *Nrl*-  
198 dependent ncRNAs with each group revealed that *Nrl*-activated and *Nrl*-repressed  
199 ncRNAs most frequently emanated from regions that were accessible in both rods and  
200 cones, suggesting that the majority of *Nrl*-dependent elements are shared  
201 photoreceptor elements common to all photoreceptor types (Figure 2C). However, when  
202 comparing the pattern of *Nrl*-dependent ncRNA expression from regions accessible in  
203 only rods or cones, a cell type-specific pattern emerged: *Nrl*-activated ncRNAs  
204 overlapped more frequently with regions only accessible in rods versus cones (105 vs  
205 38,  $p=7.9e-10$ , Figure 2C), whereas *Nrl*-repressed ncRNAs overlapped more frequently  
206 with regions only accessible in cones versus rods (Figure 2C, 137 vs 10,  $p < 2.2e-16$ ).  
207 These comparisons indicate that *Nrl*-dependent ncRNAs can be separated into three

208 distinct bins of *Nrl*-dependent candidate CREs; *Nrl*-activated or *Nrl*-repressed ncRNAs  
209 at shared rod and cone accessible regions; *Nrl*-activated ncRNAs, expressed in the  
210 wild-type retina, at regions accessible only in rods, and *Nrl*-repressed ncRNAs,  
211 expressed in the *Nrl*<sup>-/-</sup> retina, at regions accessible only in cones.

212 We asked if *Nrl*-activated and *Nrl*-repressed ncRNA expression levels were  
213 concordant with the predicted strength of rod vs. cone CREs, as defined by the local  
214 quantitative enrichment of ATAC-seq read density (Figure 2D). We compared *Nrl*-  
215 activated and *Nrl*-repressed ncRNAs to wild-type and *Nrl*-deficient ATAC-seq reads  
216 (Figure 2D, left). We observed that CREs with *Nrl*-activated ncRNAs were associated  
217 with significantly higher ATAC-seq read density in the WT retina compared with the *Nrl*<sup>-/-</sup>  
218 retina (Figure 2D;  $p=3.1e-5$ ) (GSE72550)<sup>19</sup>. Conversely, we observed that CREs with  
219 *Nrl*-repressed ncRNAs were associated with significantly higher ATAC-seq read density  
220 in the *Nrl*<sup>-/-</sup> retina compared with the WT retina (Figure 2D,  $p= 4.5e-10$ ). (GSE72550)<sup>19</sup>.

221 We next assessed the association of *Nrl*-activated and *Nrl*-repressed ncRNAs  
222 with ATAC-seq read density in sorted rods and cones (GSE83312). We found that *Nrl*-  
223 activated ncRNAs were enriched at regions of higher ATAC-seq signal in rods than in  
224 cones (Figure 2D;  $p= 2.3e-5$ ). In contrast, *Nrl*-repressed ncRNAs were enriched at  
225 regions of higher ATAC-seq signal in cones than in rods (Figure 2D;  $p= 5.3e-11$ ). These  
226 observations indicate that *Nrl*-dependent ncRNAs differentially associate with candidate  
227 rod versus cone CREs: *Nrl*-activated ncRNAs affiliated with strong rod ATAC-seq  
228 signal, whereas *Nrl*-repressed ncRNAs affiliated with strong cone ATAC signal.

229 We hypothesized that the *Nrl*-dependent change in ncRNA may correlate with  
230 cell type specific rod versus cone change in chromatin accessibility. We therefore

231 compared the *Nrl*-dependent change in ncRNA transcription at rod- and cone-specific  
232 ATAC-seq regions to the relative ATAC-seq read enrichment in rods vs. cones at those  
233 locations. We observed a positive correlation between downregulated ncRNAs and rod  
234 ATAC-seq reads, and between upregulated ncRNAs and cone ATAC-seq reads (Figure  
235 2E, Cor=0.6,  $P < 2.2e-16$ ). This result indicated that the direction and quantitative  
236 degree of *Nrl*-dependence of ncRNA expression correlated with the relative cell-type  
237 specificity of the ATAC-seq signal, for *Nrl*-activated ncRNAs with rod-specific ATAC-seq  
238 and *Nrl*-repressed ncRNAs with cone-specific ATAC-seq.

239 We compared regions with high-density putative regulatory elements<sup>43,44</sup> from  
240 rod and cone ATAC-seq with the *Nrl*-activated and *Nrl*-repressed ncRNAs. We  
241 observed that *Nrl*-activated ncRNAs predicted clusters of putative rod enhancers  
242 (Figure 2F, OR = 1.7,  $p = 4.7e-7$ ) but not cone (Figure 2F, OR 1.05,  $p = 0.64$ ). In  
243 contrast, *Nrl*-repressed ncRNAs predicted high density regulatory elements<sup>43,44</sup> from  
244 cone (Figure 2F, OR = 1.6,  $p = 1.9e-4$ ) but not rod cells (Figure 2F, OR = 0.95,  $p =$   
245 0.87). We conclude that *Nrl*-activated and repressed ncRNAs enrich two distinct  
246 regulatory pathways, identifying strong candidate CREs specific to rod and cone  
247 photoreceptors, respectively.

248 Mouse photoreceptor CREs are highly enriched for binding sites of CRX, a  
249 homeobox TF required for both rod and cone gene expression<sup>14,17,42</sup>. We asked if CREs  
250 defined by *Nrl*-dependent ncRNAs were CRX-bound. We observed significant  
251 enrichment for CRX occupancy by ChIP-seq in wild-type whole retinal tissue at *Nrl*-  
252 dependent ncRNA-defined regions of accessible chromatin (Figure 3A, top,  
253 GSE20012)<sup>15</sup>. Interestingly, using ATAC-seq data in conjunction with ncRNA

254 transcription did not improve identification of CRX-bound elements (Figure 3A, bottom),  
255 suggesting that differential ncRNA transcription independently identifies CREs likely to  
256 be bound by CRX, without the need for CRX ChIP. Regions characterized as either *Nrl*-  
257 activated or repressed from the ncRNA analysis of the *Nrl*<sup>-/-</sup> retina identified genomic  
258 CRX localization in wild-type tissue (Figure 3B, left). In *Nrl*<sup>-/-</sup> retina, only *Nrl*-repressed  
259 ncRNAs identified CRX localization, providing candidates for cone-specific CRX  
260 occupancy, as expected with the absence of rod fate in the *Nrl*<sup>-/-</sup> retina, and consistent  
261 with analysis of CRX occupancy in *Nrl*<sup>-/-</sup> retinas (Figure 3B, right)<sup>15</sup>.

262 We performed *de novo* motif analysis of *Nrl*-dependent ncRNA-defined CREs to  
263 identify potential transcriptional co-regulators. Both activated and repressed ncRNAs  
264 identified the K50 homeodomain motif (K50 indicating the presence of lysine at position  
265 50 of the homeodomain), shared among known NRL co-regulators, CRX and  
266 OTX2<sup>15,18,45</sup> (Figure 3C, row 1). We interrogated the motifs specific for *Nrl*-activated and  
267 *Nrl*-repressed CREs, attempting to identify motifs specific for rod or cone CREs,  
268 respectively. *Nrl*-activated CREs were significantly enriched for the NRL binding motif  
269 (bZip) and NR2E3 (NR), a direct downstream target of NRL<sup>37</sup> (Figure 3C, rows 2 and 4).  
270 By contrast, *Nrl*-repressed ncRNAs were differentially enriched for NeuroD1 binding  
271 motif (BHLH, Figure 3C, row 3). Thus, *Nrl*-dependent ncRNAs identify *Nrl* activated and  
272 repressed CREs characterized by specific TF binding motifs.

273 To define potential novel transcriptional pathways that are unique to rod and  
274 cone photoreceptor cell types, we assessed comparative motif enrichment for *Nrl*-  
275 activated CREs in rod-specific open chromatin versus *Nrl*-repressed CREs in cone-  
276 specific open chromatin (Figure 3D-E). We identified TF motifs unique to rods (Figure

277 3D) and cones (Figure 3E). Consistent with comparative analysis in Figure 3C, we find  
278 the NR motif unique to rod-specific elements (Figure 3D), and the bHLH binding motif  
279 unique to cone-specific regulatory elements (Figure 3E) with this comparative analysis.  
280 These differential motifs predict rod and cone specific TFs that may help define the two  
281 cell types.

282

### 283 ***Nrl*-dependent ncRNAs define functional photoreceptor regulatory elements**

284 We predicted that the ncRNA-defined candidate regulatory elements are active in  
285 photoreceptors, with at least a subset differentially active in rods versus cones. We first  
286 examined the regulatory capacity of *Nrl*-dependent ncRNA-defined CREs in the  
287 developing mouse retina. As *Otx2* is required for the genesis of rods and cones, the  
288 regulation of this locus is of great interest<sup>25</sup>. Data from the ENCODE project allowed us  
289 to identify 24 DNase I hypersensitivity sites (HS) at the *Otx2* locus, from mouse retina at  
290 P0, within 300kb around the *Otx2* gene (Figure 4A)<sup>46</sup>. These regions were compared  
291 with those identified through *Nrl*-dependent ncRNA profiling. Of the 24 ENCODE sites, 4  
292 overlapped *Nrl*-repressed ncRNAs and cone ATAC-seq peaks (Figure 4B). We  
293 examined the activity of all 24 locations to determine if candidate CREs overlapping with  
294 *Nrl*-repressed ncRNAs would be distinguished from those without overlapping ncRNAs.  
295 The DNA sequences corresponding to the DNase I HS sites were cloned into the  
296 reporter plasmid *Stagia3*, which has an eGFP-IRES-AP reporter<sup>47,48</sup>. We tested these  
297 constructs, along with a control, ubiquitously expressed CAG-Cherry plasmid, for  
298 activity in dissected mouse retina through electroporation at E14.5. E14.5 is a period of  
299 development when primarily cones, and not rods, are being generated, and

300 electroporation into mature cones at later ages is inefficient<sup>49</sup>. Retinas were then  
301 cultured as explants on filters for 2 days. Nine out of the 24 DNase I HS sites showed  
302 alkaline phosphatase (AP) activity (Figure 4A, C). Interestingly, three of the four  
303 ENCODE DNase I HS sites corresponding with *Nrl*-dependent ncRNAs with P21 cone  
304 ATAC-seq peaks were among the most active, highlighting the observation that TF-  
305 dependent ncRNAs mark potent regulatory elements (Figure 4B).

306 As cone development is regulated by both *Otx2* and Onecut 1 (*Oc1*), we also  
307 were interested in regulatory elements at the *Oc1* locus<sup>25,50</sup>. To this end, several regions  
308 predicted by the ENCODE DNase I analysis were tested (Figure 4D). As with *Otx2*, a  
309 region with strong regulatory activity had an *Nrl*-dependent ncRNA. These results  
310 indicate that intersecting TF-dependent ncRNA expression with previously published  
311 ENCODE datasets provides novel information useful for identifying strong regulatory  
312 elements, compared to utilizing chromatin accessibility alone.

313 We hypothesized that *Nrl*-repressed ncRNAs may identify CREs with cone  
314 activity. To examine whether CREs defined by the overlap of *Nrl*-repressed ncRNAs  
315 and cone ATAC-seq peaks have activity in developing cones, we examined ncRNA  
316 defined elements from the *Otx2* and *Rxrg* loci, as these genes are known to be  
317 important for cone development<sup>30,51</sup>. The DNA sequences from these loci (material and  
318 methods) were cloned into the Stagia3 reporter plasmid. We also tested putative CREs  
319 defined by ncRNA expression for other genes involved in the development of the visual  
320 system (*En2*, *Socs3*, *Nab1*, *Six6*, *Opn1sw*), as well as *Pde6b*, a rod-specific gene.  
321 These plasmids were delivered by electroporation of ex-vivo E14.5 mouse retinas and  
322 assayed for AP activity 2 days later (Figure 4E). The ThrbCRM1-dtTomato construct

323 was used as a positive control for AP, as it has known activity in cones, HCs, and a  
324 subset of RPCs that produce cones and HCs in the chick retina<sup>25</sup>. Ten of 12 candidate  
325 regulatory elements were able to drive AP expression in explanted E14.5 mouse retinal  
326 tissue (Figure 4E).

327 To define the specific cell-types with reporter activity, active enhancer constructs  
328 were tested for expression of eGFP, which provided greater cellular resolution and  
329 coincident assay with cell-type specific marker co-expression. The ThrbCRM1-tdTomato  
330 plasmid was first tested for its use as a positive control to specifically mark murine  
331 cones. ThrbCRM1-tdTomato positive cells were located in the apical region of  
332 electroporated E15.5 retinas (Figure 5A), which is the location of developing cones<sup>18,25</sup>,  
333 and they were positive for the Rxrg protein, a validated cone marker (Figure 5B). We  
334 then examined co-expression of eGFP, driven by the *Nrl*-repressed ncRNA constructs,  
335 and tdTomato from ThrbCRM1 following electroporation into E14.5 retinal explants.  
336 GFP-positive cells from 7 of the *Nrl*-repressed ncRNA constructs were located in the  
337 apical region and showed a strong overlap with tdTomato (Figure 5C). The only  
338 exception was the *Socs3* element (Figure 5C), which marked cells with a morphology  
339 and position matching those of RPCs. We further tested the expression from the *Otx2*  
340 ncRNA-defined enhancer regions 1 and 2 with that of the OTX2 protein (Figure 5D).  
341 Both *Otx2*-ncRNA-defined elements showed strong co-localization with the *Otx2*  
342 protein. Together, these findings indicate that CREs marked by *Nrl*-dependent ncRNAs  
343 in the *Nrl* mutant setting have activity in developing cones.

344

345

## 346 **Discussion**

### 347 **Application of enhancer transcription to the definition of *Cis*-Regulatory Elements**

348 Defining the GRNs that distinguish healthy and disease states requires the  
349 identification of the functionally relevant CREs and TFs that regulate them. Current  
350 approaches for nominating CREs, including histone modifications, chromatin status<sup>3-5</sup>  
351 and TF occupancy<sup>6</sup>, have been successful in many contexts. However, only a small  
352 fraction of the thousands of candidate TF-dependent enhancers identified by these  
353 approaches have been functionally validated<sup>52</sup>. Moreover, these approaches do not  
354 reveal context specificity of expression from a region, nor provide a quantitative  
355 assessment of enhancer function<sup>1,53</sup>. We previously defined a complementary approach  
356 to regulatory region identification, utilizing context-dependent enhancer transcriptional  
357 profiling, to nominate regulatory elements. This approach defined a GRN composed of  
358 functional elements in cardiomyocytes defined by ncRNA expression from the adult  
359 mouse heart that contribute to cardiac rhythm control<sup>1</sup>. Here we extended TF-  
360 dependent ncRNA profiling to define regulatory regions that govern photoreceptor gene  
361 expression in the retina and assess the applicability of this approach for defining both  
362 wild-type and mutant elements that comprise context-specific GRNs.

363

### 364 **Regulatory regions active in photoreceptors and their progenitor cells**

365 An understanding of the GRNs that govern photoreceptor production is  
366 particularly important, given the desire to generate cones from stem cells for therapeutic  
367 applications<sup>13</sup>. Definition of the GRN for cone genesis has been limited, as cones are  
368 typically born early, when access is limited, and cones are much less abundant than



369 rods. The conversion of rods to cone-like cells in the *Nrl*<sup>-/-</sup> mouse has provided a deeper  
370 understanding of the molecular components of both cones and rods, including the  
371 identification of rod- and cone-enriched transcripts<sup>18,28</sup>, as well as the delineation of rod  
372 and cone open chromatin regions<sup>18,19</sup>. These datasets have provided an excellent  
373 background for an assessment of TF-dependent ncRNA profiling as a method for  
374 nominating regulatory regions near *Nrl*-dependent genes.. Consistent with a correlation  
375 between ncRNA transcription and regulatory region activity, the *Nrl*-dependent ncRNAs  
376 defined regions that had a high density of marks of regulatory regions, such as those  
377 proximal to *Rxrg*, *Otx2*, and *Gas6*<sup>7-10, 43,44</sup>.

378 *Nrl*-dependent ncRNAs that were upregulated in the *Nrl* mutant retina identified  
379 candidate regulatory regions associated with cone genes, and ncRNAs that were  
380 downregulated in the *Nrl* mutant identified candidate regulatory regions associated with  
381 rod genes. Functional examination of enhancer activity for a subset of these predicted  
382 elements at relevant cone genes showed cell type specificity for the majority of *Nrl*-  
383 repressed elements (Figure 5). However, a small number of tested elements did not  
384 display the predicted cone pattern of activity. A few had activity in other cell types, or  
385 had no specific activity in retinal explants. Some DNase I hypersensitivity sites from the  
386 *Otx2* locus where we found *Nrl*-repressed elements also had activity in bipolar  
387 interneurons (not shown, Wang et al. in preparation), which are born in the postnatal  
388 period, and in rods<sup>54</sup>. This may be due to the fact that the CREs defined by ncRNAs and  
389 ATAC-seq peaks are typically fairly large and thus may harbor multiple TF binding sites.  
390 These binding sites may be rod, cone, or bipolar cell-specific, and may rely on higher  
391 ordered chromatin structure for proper regulation, structure that likely is not included in

392 electroporated plasmids. Elements that showed no specific activity in retinal explants  
393 may be active in mature cones, and not in the cone progenitor cells or immature cones  
394 that were assayed here.

395 While many of the genes associated with the ncRNA-repressed list were related  
396 to cone development or function (*Otx2*, *Rxrg*, *Gngt2*, *Gnat2*, *Opn1sw*, *Sall3*)<sup>30,51,55-57</sup>, we  
397 also found genes that are generally important for eye or retina development that have  
398 not been well characterized with respect to cone-specific development. Interestingly, the  
399 ncRNA-defined CRE associated with *Six6*, an eye-field TF, or the element near *En2*, a  
400 gene important for ganglion cell differentiation<sup>18,58</sup>, displayed reporter activity in cones.  
401 These results suggest that non-coding transcriptional profiling uncovered not only rod-  
402 and cone-specific regulatory programs, but potential shared regulatory programs that  
403 warrant further investigation.

404

#### 405 **Defining TF-dependent networks of cell fate has implications for the study of** 406 **disease-specific regulatory pathways**

407 Defining both activated and repressed regulatory programs has significance  
408 across biological contexts for distinguishing the CREs driving gene regulation in normal  
409 versus mutant, or disease, states. Disease GRNs have been primarily characterized via  
410 discovery of wild-type enhancers, followed by assessment of disease-specific changes  
411 in their activity. This presumes a model in which disruption of the wild-type GRN  
412 sufficiently describes the disease state. However, our findings highlight an emergent,  
413 mutant-specific, GRN through the use of context-specific CRE activity. Defining  
414 regulatory pathways in NRL presence and absence parallels potential studies of healthy

415 versus diseased states. Defining such context-specific CREs in disease states may  
416 define novel regulatory pathways that mediate disease pathogenesis, with potential  
417 therapeutic implications. The effectiveness of enhancer transcriptional profiling for  
418 identifying emergent networks suggests a potential for future application, for the  
419 assessment of both cell-type specific and disease GRNs.

420

421

422 **Acknowledgments:** This research was supported in part by NIH R01 HL092153,  
423 R01HL124836, and R33 HL123857 to IPM, R01EY024958, R01EY025196, and  
424 R01EY026672 to JCC, F30 HL131298 to RDN, AHA Collaborative Sciences Award to  
425 IPM, and HHMI (CLC). This research was supported in part by the Leducq Foundation  
426 (IPM). This research was supported in part by the NIH through resources provided by  
427 the Computation Institute and the Biological Sciences Division of the University of  
428 Chicago and Argonne National Laboratory, under grant 1S10OD018495-01. N.L. was  
429 supported by post-doctoral fellowships from the Swiss National Science Foundation and  
430 the Human Frontiers Science Program.  
431

## 432 **Materials and Methods**

433

### 434 *Animals*

435 *Nrf1*<sup>-/-</sup> mice were generated as previously described<sup>18,59</sup>. Mouse husbandry and all  
436 procedures (including euthanasia by CO<sub>2</sub> inhalation and cervical dislocation) were  
437 conducted in accordance with the Guide for the Care and Use of Laboratory Animals of  
438 the National Institutes of Health, and were approved by the Washington University in St.  
439 Louis Institutional Animal Care and Use Committee. For ex-vivo enhancer testing, wild-  
440 type embryos were obtained from timed pregnant CD1 mice (Charles River  
441 Laboratories). All animal studies were approved by the Institutional Animal Care and  
442 Use Committee at Harvard University.

443

### 444 *Coding RNA-Seq library preparation and Data analysis*

445 Libraries were prepared from this RNA starting with 1 g per sample and using the  
446 mRNA-seq Sample Prep Kit (Illumina) as per recommended instructions. After Ribozero  
447 purification and removing only ribosomal RNA, barcoded libraries were prepared  
448 according to Illumina's instructions (2013) accompanying the TruSeq RNA Sample prep  
449 kit v2 (Part# RS-122-2001). Libraries were quantitated using the Agilent Bio-analyzer  
450 (model 2100) and pooled in equimolar amounts. The pooled libraries were sequenced  
451 with stranded 50-bp single-end reads on the HiSeq2500 in Rapid Run Mode following  
452 the manufacturer's protocols (2013).

453

454 RNA library preparation was performed as previously discussed<sup>1</sup>. Briefly, 22M to 30M  
455 reads were mapped to mouse genome with TopHat2 (v 2.1.1). Reads mapped to the  
456 mitochondrial genome, and with phred score < 30 were excluded. Counts were retrieved  
457 with HTseq (v.0.6.0)<sup>60</sup> in union mode. Lastly, counts were analyzed for differential  
458 expression with R (3.4) package DEseq2<sup>61</sup>.

#### 459 *Noncoding RNA-Seq library preparation*

460 Total RNA was extracted by TRIzol Reagent (Invitrogen), followed by ribosomal and  
461 polyA depletion. After RiboZero purification and oligo-dT depletion, RNA Barcoded  
462 Libraries were prepared according to Illumina's instructions (2013) accompanying the  
463 TruSeq RNA Sample prep kit v2 (Part# RS-122-2001). Libraries were quantitated using  
464 the Agilent Bio-analyzer (model 2100) and pooled in equimolar amounts. The pooled  
465 libraries were sequenced with 50-bp stranded single-end reads on the HiSEQ4000 in  
466 Rapid Run Mode following the manufacturer's protocols (2013).

#### 467 *Noncoding RNA-Seq Data analysis*

468 About 170–186 million high-quality reads (quality score >30) reads for each sample  
469 were obtained. Fastq files were aligned to UCSC genome build mm9 using TopHat  
470 (version 2.0.10) as previously described<sup>62</sup> and between 168 million and 174 million  
471 reads were successfully mapped. RABT assembly was performed by Cufflinks (version  
472 2.2.1, with parameters `-g --frag-bias-correct --multi-read-correct --upper-quartile-norm`),  
473 as it can recover transcripts that are transcribed from segments of the genome that are  
474 missing from the current genome assembly. Analysis of differential expression was  
475 performed using Cuffdiff from the Cufflinks package<sup>62</sup>. False discovery rate (FDR) was

476 calculated after removing the coding-gene counts. Significance was considered to have  
477 been reached when FDR was <0.05 and fold change was > 2. The mm9 genomic  
478 coordinates of identified noncoding transcripts were lifted over to the mouse mm10  
479 before comparisons with open chromatin and TF-binding regions.

#### 480 *GO enrichment analysis*

481 Enrichment of GO Biological Process terms from genes within 2MB of ncRNAs was  
482 performed with Bioconductor package GOstats version 2.46<sup>63</sup>.

#### 483 *ATAC-seq and ChIP-seq data processing*

484 Fastq files from previously generated ChIP-seq (GSE20012) and ATAC-seq  
485 (GSE83312) datasets were downloaded from GEO and processed identically as  
486 previously described<sup>18</sup>. Briefly, adapter sequences were clipped from reads using  
487 Cutadapt<sup>64</sup>, then aligned to UCSC mouse genome mm10 with bowtie version 2.3.4<sup>65</sup> in  
488 end-to-end mode. Mismatched reads, PCR duplicates, ENCODE blacklisted regions,  
489 and reads with quality < 30 were removed with Samtools version 1.5<sup>66</sup>. For ATAC-seq,  
490 fragments with width > 147 base pairs were removed to enrich for nucleosome free  
491 reads using a custom script. Peaks for both assays were called with Macs 2.11<sup>67</sup>.

#### 492 *Associating ncRNAs and regulatory elements*

493 Open chromatin peaks and TF-binding peaks were intersected with ncRNAs using  
494 Bioconductor package GenomicRanges<sup>54</sup> allowing for a 500bp gap.

495 *Metagene analysis*

496 To compare the coverage of CHIP-seq and ATAC-seq regions in differentially expressed  
497 ncRNAs we used Bioconductor Package Metagene (2.12.1). Coverage was normalized  
498 to reads per million. We binned the position of each region to 100 bp. We modified the  
499 current Metagene source code to output boxplots as opposed to ribbons and we then  
500 tested the difference of means with ANOVA.

501 *Identification of differentially accessible peaks*

502 Rod and cone ATAC-seq peak regions were combined and sorted with bash commands  
503 (cat sort). Counts were retrieved from each alignment file using Bedtools multicov  
504 (2.26.0) and tested for differential expression with DESeq2<sup>^</sup>. Peaks were considered  
505 differentially accessible when log<sub>2</sub> fold change greater than 1 and p-adjusted value less  
506 than 0.05 and these regions were considered cone-specific and rod-specific. To assess  
507 the relationship between differentially expressed ncRNAs and differentially accessible  
508 open chromatin we performed a global overlap of all ncRNA regions and combined  
509 ATAC-seq regions. Then differential regions from both sets were highlighted.

510

511 *Motif Enrichment Analysis*

512 Known and de novo motif scanning was performed with HOMER (4.3) using Rod-  
513 specific and cone-specific ATAC-seq regions that intersected with *Nrl* wildtype ncRNAs  
514 and *Nrl* null ncRNAs respectively. Target sequences consisted of 200 bp elements  
515 centered on peak summits. Background sequences consisted of approximately 50,000  
516 randomly selected 200 bp intervals from the mouse genome normalized for mono- and  
517 di-nucleotide content relative to each target set. Repeat sequences were masked from



518 the genome, and targets with >70% of bases masked were dropped from enrichment  
519 analysis. Preferential spacing between highly enriched motifs (MAF, bZIP, and NR  
520 motifs) in differential regions was assessed by first centering the above intersect on  
521 individual motifs and plotting the density.

522

### 523 *Identification of high density peaks regions*

524 Cone and Rod specific high density peak regions were marked by HOMER (4.3) using a  
525 12.5kb window<sup>43,44</sup>. Alignment files for rod and cone ATAC-seq were used to find peaks  
526 with Homer using the parameter `–style Super`.

527

### 528 *Retina electroporation and AP staining*

529 Ex vivo retina electroporation was carried out as described previously<sup>68,69</sup>, with at least  
530 three biological replicates for AP staining, or at least in duplicates for  
531 immunohistochemistry. The chamber used for electroporation was modified as  
532 previously described<sup>70</sup>. Stages of embryos used for the experiments are described in  
533 the main text of in the figure legends. Electroporation settings were 5x30 V pulses, 50  
534 ms each and 950 ms apart. DNA concentration was 400-600ng/ul for control plasmids  
535 and 1ug/ul for enhancer constructs. Retinas were harvested after 2 days in culture.

536

### 537 *Plasmid and DNA sequences*

538 In vivo enhancer testing was performed with the Stagia3 reporter vector (Addgene  
539 #28177)<sup>48</sup>. Enhancer testing with the CAG-EGFP, CAG-mCherry, and ThrbCRM1-

540 tdTomato vectors were modified from our previous work<sup>25,69</sup>. Coordinated of regions  
541 cloned are shown in mm10 assembly.

542 O10> chr14:48616314-48617497  
543 O11> chr14: 48624486-48626389  
544 O5> chr14: 48579937-48581029  
545 O6> chr14: 48584564-48585012  
546 O7> chr14: 48593170-48594188  
547 O8> chr14: 48606973-48608016  
548 O9> chr14: 48608144-48609697  
549 O15> chr14:48662841-48663211  
550 O20> chr14:48740203-48742409  
551 Oc1 A> chr9:74384085-74384740  
552 Oc1 B> chr9 74530189-74532399  
553 Oc1 C> chr9:74810971-74812406  
554 Otx2 ncRNA1>chr14 + 48580418 48580655  
555 Otx2 ncRNA2>chr14 + 48593310 48594038  
556 Otx2 ncRNA3>chr14 + 48608844 48609310  
557 Otx2 ncRNA4>chr14 + 48617045 48617321  
558 Rxrg ncRNA>chr1 + 167438156 167438645  
559 Pde6b ncRNA>chr5 + 108366779 108367075  
560 En2 ncRNA>chr5 + 28145373 28145644  
561 Socs3 ncRNA>chr11 + 117963224 117963787  
562 Nab1 ncRNA>chr1 + 52435750 52436194

563 Six6 ncRNA1>chr12 + 72854405 72854809

564 Six6 ncRNA2>chr12 + 72831804 72832279

565 Opn1sw ncRNA>chr6 + 29394311 29394823

566

567 *IHC*

568 20-30um retinal section were prepared and stained as described previously<sup>68</sup>. Blocking  
569 solution was: 0.3% Triton in 1x PBS. Primary antibodies used in this study include:  
570 chicken anti-GFP (1:1000, Abcam, AB13970), rabbit anti-mCherry (1:1000, Abcam,  
571 167453), rabbit anti-Otx2 (1:500, Millipore, AB9566), mouse anti-Rxrg (1:300, Santa  
572 Cruz Biotechnology, sc-514134). Secondary antibodies were from Jackson  
573 Immunoresearch.

574

575 *Imaging*

576 Retina explants were imaged on a Leica M165FC microscope. Retinal section images  
577 were acquired by a Zeiss LSM780 inverted confocal microscope from the Microscopy  
578 Resources on the North Quad (MicRoN) core at Harvard Medical School.

579

580

581 **Figure legends**

582 **Figure 1: Transcriptional profiling identifies *Nrl*-dependent coding and non-**  
583 **coding RNAs**

584 A) Volcano-plot ( $\log_2$  (fold-change) vs  $-\log_{10}$  ( $P_{Adj}$ )) of *Nrl*<sup>+/+</sup> vs *Nrl*<sup>-/-</sup> coding transcripts.  
585 Significantly misregulated genes ( $P_{Adj} < 0.05$ ) in blue, and non-significant in grey.  
586 Selected significant coding genes known to play a role in photoreceptor differentiation  
587 labeled (black).

588 B) Principle component analysis on WT and *Nrl*<sup>-/-</sup> coding transcripts. Samples segregate  
589 primarily by genotype, describing 98% of variance on PC1.

590 C) Volcano-plot ( $\log_2$  (fold-change) vs  $-\log_{10}$  ( $P_{Adj}$ )) of *Nrl*<sup>+/+</sup> vs *Nrl*<sup>-/-</sup> non-coding RNAs  
591 (ncRNAs). Significantly misregulated ncRNAs ( $P_{Adj} < 0.05$ ) are depicted in blue and  
592 non-significant in grey. Selected transcripts labeled by nearest *Nrl*-dependent coding  
593 genes (black).

594 D) Principle component analysis on WT and *Nrl*<sup>-/-</sup> noncoding transcripts. Samples  
595 segregate primarily by genotype, describing 98% of variance on PC1.

596 D) Top: Venn diagram of the overlap of ATAC-seq from control mouse retina  
597 (GSE72550) and *Nrl*-dependent ncRNA transcripts (OR = 5.56,  $P < 2.2e-16$ ). P-values  
598 and Odds Ratios from Fisher Exact Test. Bottom: Gene ontology (GO) analysis of  
599 nearby (2Mb) *Nrl*-dependent genes to defined *Nrl*-dependent ncRNAs. Fisher Odds  
600 (gray) and  $-\log(FDR)$  (Red). Significantly enriched GO terms are related to visual  
601 processes, including “rhodopsin mediated signaling”, “phototransduction”, and  
602 “detection of light stimulus”.

603 F) Scatterplot in hexagonal binning for the *Nrl*-dependent ncRNAs. Differential  
604 expression fold change (log2) of nearest *Nrl*-dependent gene vs differential expression  
605 fold change (log2) of ncRNAs (x-axis).

606

607 **Figure 2: *Nrl*-activated and repressed ncRNAs identify cell-type specific**  
608 **regulatory programs**

609 A) Venn diagrams of the overlap of *Nrl*-activated (top) and *Nrl*-repressed (bottom)  
610 ncRNAs with ATAC-seq from rod photoreceptors (GSE83312). P-values and Odds  
611 Ratios from Fisher Exact Test.

612 B) Venn diagrams of the overlap of *Nrl*-activated (top) and *Nrl*-repressed (bottom)  
613 ncRNAs with ATAC-seq from sCone photoreceptors (GSE83312). P-values and Odds  
614 Ratios from Fisher Exact Test.

615 C) Venn diagram depicting the intersections of ATAC-seq from rods and ATAC-seq  
616 from sCones (GSE83312) with *Nrl*-repressed and *Nrl*-activated ncRNAs. P-values and  
617 Odds Ratios from Fisher Exact Test.

618 D) Boxplots depicting the enrichment of Mean Reads per Million (RPM) of ATAC-seq  
619 from WT P21 mouse retinas and in *Nrl*<sup>-/-</sup> ATAC-seq P21 mouse retinas (left,  
620 GSE72550) and of Rod-specific ATAC-Seq and sCone specific ATAC-Seq (right,  
621 GSE83312) in *Nrl*-activated (green) and *Nrl*-repressed (blue) compared with  
622 background (Bkg) non-*Nrl* dependent ncRNAs (red). P-value calculated by ANOVA  
623 testing.

624 E) Scatterplot depicting correlation of differentially expressed ncRNA transcripts with  
625 RPM of differentially expressed ATAC regions from rod (red) and cone photoreceptors

626 (blue).  $\text{Log}_2(\text{sCone ATAC RPM}/\text{Rod ATAC RPM})$  vs  $\text{log}_2(\text{Nrl}^{-/-} \text{ ncRNA RPM}/\text{Nrl}^{+/+}$   
627 ncRNA RPM). Non-significantly changed transcripts in gray.

628 F) Venn diagram depicting the overlap of annotated rod and cone specific elements as  
629 defined by high density reads<sup>43,44,55</sup> with *Nrl*-activated ncRNAs (left) and *Nrl*-repressed  
630 ncRNAs (right). P-values and Odds Ratios from Fisher Exact Test.

631

632 **Figure 3: ncRNA-defined cell-type specific regulatory elements are enriched for**  
633 **cell-type specific TF motifs**

634 A) Venn diagram of the overlap of total *Nrl*-dependent ncRNAs (top) and the  
635 intersection of *Nrl*-dependent ncRNAs with Retinal ATAC (GSE74661, bottom) with  
636 CRX bound sites from ChIPseq in whole mouse retinas (GSE20012).

637 B) Boxplots depicting the relative enrichment of *Nrl*-activated (green) and *Nrl*-repressed  
638 (blue) ncRNAs in control CRX ChIP retinas (left) and *Nrl*<sup>-/-</sup> CRX ChIP retinas (right), in  
639 relation to the ncRNA background (red). P value calculated by ANOVA testing.

640 C) Position Weight Matrix (PWM, top) of select *de novo* binding motifs identified by *Nrl*-  
641 dependent ncRNAs. Motif Density (bottom) as a function of distance from center (bp) in  
642 *Nrl*-activated (Blue) and *Nrl*-repressed (Red). Hbox motif (CRX, OTX), BHLH motif  
643 (NeuroD1, NeuroG2), NR (NR2E3) and bZip (NRL, Mafa) motifs shown.

644 D) Position Weight Matrix (PWM) of rod-specific *de novo* binding motifs grouped by TF  
645 family and ranked by p-value.

646 E) Position Weight Matrix (PWM) of cone-specific *de novo* binding motifs grouped by TF  
647 family and ranked by p-value.

648

649 **Figure 4: *Nrl*-repressed ncRNAs identify cone-specific regulatory elements with**  
650 **regulatory activity *ex vivo***

651 A) Annotation track shows ENCODE DNaseI Hypersensitivity Sites for mouse retinal  
652 cells at various stages of development for the *Otx2* locus. 24 peaks were selected for  
653 further testing (O1-O23) within a ~300kb region centered around *Otx2*.

654 B) *Nrl*-dependent ncRNAs at the *Otx2* locus and the nearest ATAC-seq from cone P21  
655 cells.

656 C) DNA sequences corresponding to the DNase I HS peaks annotated in (A) were  
657 cloned into the reporter plasmid *Stagia3* (alkaline phosphatase (AP) and EGFP) and  
658 tested for activity in the mouse retina by *ex vivo* electroporation at E14.5 along with a  
659 co-electroporation control CAG-Cherry. Retinas were then cultured as explant on filters  
660 for 2 days. Positive regions are shown in green in (A), while the negative are in red.

661 D) Electroporated constructs containing DNA sequences defined by retina DNase I HS  
662 from ENCODE at the *Onecut1* locus.

663 E) Retinal explants electroporated with ncRNA DNA sequences defined by cone ATAC-  
664 seq peaks associated with the ncRNAs found at the *Otx2* locus and other known retinal  
665 genes.

666

667 **Figure 5: *Nrl*-repressed ncRNAs identify functional cone-specific regulatory**  
668 **elements *in vivo*.**

669 A) Transversal sections of retina from mice electroporated at E15.5 (A) or E14.5 (B-  
670 D) and cultured for 2 days before fixation and embedding are shown. The *Thrb*CRM1-  
671 dtTomato enhancer was electroporated into mouse retina with an ubiquitous CAG-GFP

672 co-electroporation control. ThrbCRM1 positive cells are located in the apical region of  
673 the developing ONL, where photoreceptors are found (left). The co-electroporation GFP  
674 reporter is expressed in mitotic cells at the time of the electroporation.

675 B) The ThrbCRM1 enhancer (left) was expressed in cells positive for Rxrg protein  
676 (center), a cone marker gene.

677 C) Positive regions from our AP screen were co-electroporated (Figure 5 E) along  
678 with the ThrbCRM1-dtTomato enhancer (left). The Stagia3 reporter plasmid used for AP  
679 also contains an eGFP readout (center column). All but one of the cells positive for the  
680 putative enhancers tested are located in the developing ONL, and show a strong  
681 overlap with the cone marker ThrbCRM1.

682 D) Two Nrl-dependent ncRNAs at the Otx2 locus were tested (left column) for their  
683 co-localization with the Otx2 protein (center). Both showed a strong overlap (composite  
684 image, right column).

685

686

687



688 **References**

689

690 1 Yang, X. H. *et al.* Transcription-factor-dependent enhancer transcription defines  
691 a gene regulatory network for cardiac rhythm. *eLife* **6**, doi:10.7554/eLife.31683  
692 (2017).

693 2 Consortium, E. P. An integrated encyclopedia of DNA elements in the human  
694 genome. *Nature* **489**, 57-74, doi:10.1038/nature11247 (2012).

695 3 Bonn, S. *et al.* Tissue-specific analysis of chromatin state identifies temporal  
696 signatures of enhancer activity during embryonic development. *Nat Genet* **44**,  
697 148-156, doi:10.1038/ng.1064 (2012).

698 4 Creighton, M. P. *et al.* Histone H3K27ac separates active from poised  
699 enhancers and predicts developmental state. *Proc Natl Acad Sci U S A* **107**,  
700 21931-21936, doi:10.1073/pnas.1016071107 (2010).

701 5 Werner, M. S. & Ruthenburg, A. J. Nuclear Fractionation Reveals Thousands of  
702 Chromatin-Tethered Noncoding RNAs Adjacent to Active Genes. *Cell reports* **12**,  
703 1089-1098, doi:10.1016/j.celrep.2015.07.033 (2015).

704 6 Visel, A. *et al.* ChIP-seq accurately predicts tissue-specific activity of enhancers.  
705 *Nature* **457**, 854-858, doi:10.1038/nature07730 (2009).

706 7 Davidovich, C. & Cech, T. R. The recruitment of chromatin modifiers by long  
707 noncoding RNAs: lessons from PRC2. *Rna* **21**, 2007-2022,  
708 doi:10.1261/rna.053918.115 (2015).

709 8 Engreitz, J. M. *et al.* Local regulation of gene expression by lncRNA promoters,  
710 transcription and splicing. *Nature* **539**, 452-455, doi:10.1038/nature20149 (2016).

- 711 9 Wang, D. *et al.* Reprogramming transcription by distinct classes of enhancers  
712 functionally defined by eRNA. *Nature* **474**, 390-394, doi:10.1038/nature10006  
713 (2011).
- 714 10 Wu, H. *et al.* Tissue-specific RNA expression marks distant-acting developmental  
715 enhancers. *PLoS genetics* **10**, e1004610, doi:10.1371/journal.pgen.1004610  
716 (2014).
- 717 11 Young, R. W. Cell differentiation in the retina of the mouse. *The Anatomical*  
718 *record* **212**, 199-205, doi:10.1002/ar.1092120215 (1985).
- 719 12 Jeon, C. J., Strettoi, E. & Masland, R. H. The major cell populations of the mouse  
720 retina. *J Neurosci* **18**, 8936-8946 (1998).
- 721 13 Oswald, J. & Baranov, P. Regenerative medicine in the retina: from stem cells to  
722 cell replacement therapy. *Ther Adv Ophthalmol* **10**, 2515841418774433,  
723 doi:10.1177/2515841418774433 (2018).
- 724 14 Aldiri, I. *et al.* The Dynamic Epigenetic Landscape of the Retina During  
725 Development, Reprogramming, and Tumorigenesis. *Neuron* **94**, 550-568 e510,  
726 doi:10.1016/j.neuron.2017.04.022 (2017).
- 727 15 Corbo, J. C. *et al.* CRX ChIP-seq reveals the cis-regulatory architecture of mouse  
728 photoreceptors. *Genome Res* **20**, 1512-1525, doi:10.1101/gr.109405.110 (2010).
- 729 16 Corbo, J. C., Myers, C. A., Lawrence, K. A., Jadhav, A. P. & Cepko, C. L. A  
730 typology of photoreceptor gene expression patterns in the mouse. *Proceedings*  
731 *of the National Academy of Sciences of the United States of America* **104**,  
732 12069-12074, doi:10.1073/pnas.0705465104 (2007).

- 733 17 Hsiau, T. H. *et al.* The cis-regulatory logic of the mammalian photoreceptor  
734 transcriptional network. *PLoS One* **2**, e643, doi:10.1371/journal.pone.0000643  
735 (2007).
- 736 18 Hughes, A. E., Enright, J. M., Myers, C. A., Shen, S. Q. & Corbo, J. C. Cell Type-  
737 Specific Epigenomic Analysis Reveals a Uniquely Closed Chromatin Architecture  
738 in Mouse Rod Photoreceptors. *Scientific reports* **7**, 43184,  
739 doi:10.1038/srep43184 (2017).
- 740 19 Mo, A. *et al.* Epigenomic landscapes of retinal rods and cones. *eLife* **5**, e11613,  
741 doi:10.7554/eLife.11613 (2016).
- 742 20 Sinha, D., Phillips, J., Joseph Phillips, M. & Gamm, D. M. Mimicking Retinal  
743 Development and Disease With Human Pluripotent Stem Cells. *Investigative*  
744 *ophthalmology & visual science* **57**, ORSFf1-9, doi:10.1167/iovs.15-18160  
745 (2016).
- 746 21 Aguirre, G. D. Concepts and Strategies in Retinal Gene Therapy. *Investigative*  
747 *ophthalmology & visual science* **58**, 5399-5411, doi:10.1167/iovs.17-22978  
748 (2017).
- 749 22 Juettner, J. *et al.* Targeting neuronal and glial cell types with synthetic promoter  
750 AAVs in mice, non-human primates, and humans. *bioRxiv*, doi:10.1101/434720  
751 (2018).
- 752 23 Altshuler, D. & Lillien, L. Control of photoreceptor development. *Current opinion*  
753 *in neurobiology* **2**, 16-22 (1992).
- 754 24 Gonzalez-Cordero, A. *et al.* Recapitulation of Human Retinal Development from  
755 Human Pluripotent Stem Cells Generates Transplantable Populations of Cone

- 756 Photoreceptors. *Stem Cell Reports* **9**, 820-837, doi:10.1016/j.stemcr.2017.07.022  
757 (2017).
- 758 25 Emerson, M. M., Surzenko, N., Goetz, J. J., Trimarchi, J. & Cepko, C. L. Otx2  
759 and Onecut1 promote the fates of cone photoreceptors and horizontal cells and  
760 repress rod photoreceptors. *Developmental cell* **26**, 59-72,  
761 doi:10.1016/j.devcel.2013.06.005 (2013).
- 762 26 Hafler, B. P. *et al.* Transcription factor Olig2 defines subpopulations of retinal  
763 progenitor cells biased toward specific cell fates. *Proceedings of the National*  
764 *Academy of Sciences of the United States of America* **109**, 7882-7887,  
765 doi:10.1073/pnas.1203138109 (2012).
- 766 27 Corso-Diaz, X., Jaeger, C., Chaitankar, V. & Swaroop, A. Epigenetic control of  
767 gene regulation during development and disease: A view from the retina.  
768 *Progress in retinal and eye research* **65**, 1-27,  
769 doi:10.1016/j.preteyeres.2018.03.002 (2018).
- 770 28 Swaroop, A., Kim, D. & Forrest, D. Transcriptional regulation of photoreceptor  
771 development and homeostasis in the mammalian retina. *Nat Rev Neurosci* **11**,  
772 563-576, doi:10.1038/nrn2880 (2010).
- 773 29 Inoue, T., Nishida, A. & Furukawa, T. [Transcriptional regulation of retinal  
774 photoreceptor cell development]. *Tanpakushitsu kakusan koso. Protein, nucleic*  
775 *acid, enzyme* **49**, 1413-1420 (2004).
- 776 30 Nishida, A. *et al.* Otx2 homeobox gene controls retinal photoreceptor cell fate  
777 and pineal gland development. *Nature neuroscience* **6**, 1255-1263,  
778 doi:10.1038/nn1155 (2003).

- 779 31 Koike, C. *et al.* Functional roles of Otx2 transcription factor in postnatal mouse  
780 retinal development. *Molecular and cellular biology* **27**, 8318-8329,  
781 doi:10.1128/MCB.01209-07 (2007).
- 782 32 Mears, A. J. *et al.* Nrl is required for rod photoreceptor development. *Nature*  
783 *genetics* **29**, 447-452, doi:10.1038/ng774 (2001).
- 784 33 Brooks, M. J., Rajasimha, H. K., Roger, J. E. & Swaroop, A. Next-generation  
785 sequencing facilitates quantitative analysis of wild-type and Nrl(-/-) retinal  
786 transcriptomes. *Molecular vision* **17**, 3034-3054 (2011).
- 787 34 Kim, J. W. *et al.* NRL-Regulated Transcriptome Dynamics of Developing Rod  
788 Photoreceptors. *Cell reports* **17**, 2460-2473, doi:10.1016/j.celrep.2016.10.074  
789 (2016).
- 790 35 Nadadur, R. D. *et al.* Pitx2 modulates a Tbx5-dependent gene regulatory network  
791 to maintain atrial rhythm. *Sci Transl Med* **8**, 354ra115,  
792 doi:10.1126/scitranslmed.aaf4891 (2016).
- 793 36 Buenrostro, J. D., Giresi, P. G., Zaba, L. C., Chang, H. Y. & Greenleaf, W. J.  
794 Transposition of native chromatin for fast and sensitive epigenomic profiling of  
795 open chromatin, DNA-binding proteins and nucleosome position. *Nat Methods*  
796 **10**, 1213-1218, doi:10.1038/nmeth.2688 (2013).
- 797 37 Chen, X. *et al.* ATAC-se reveals the accessible genome by transposase-  
798 mediated imaging and sequencing. *Nat Methods* **13**, 1013-1020,  
799 doi:10.1038/nmeth.4031 (2016).

- 800 38 Li, W., Notani, D. & Rosenfeld, M. G. Enhancers as non-coding RNA  
801 transcription units: recent insights and future perspectives. *Nat Rev Genet* **17**,  
802 207-223, doi:10.1038/nrg.2016.4 (2016).
- 803 39 Oh, E. C. *et al.* Transformation of cone precursors to functional rod  
804 photoreceptors by bZIP transcription factor NRL. *Proceedings of the National*  
805 *Academy of Sciences of the United States of America* **104**, 1679-1684,  
806 doi:10.1073/pnas.0605934104 (2007).
- 807 40 Yoshida, S. *et al.* Expression profiling of the developing and mature Nrl<sup>-/-</sup> mouse  
808 retina: identification of retinal disease candidates and transcriptional regulatory  
809 targets of Nrl. *Human molecular genetics* **13**, 1487-1503,  
810 doi:10.1093/hmg/ddh160 (2004).
- 811 41 Akimoto, M. *et al.* Targeting of GFP to newborn rods by Nrl promoter and  
812 temporal expression profiling of flow-sorted photoreceptors. *Proceedings of the*  
813 *National Academy of Sciences of the United States of America* **103**, 3890-3895,  
814 doi:10.1073/pnas.0508214103 (2006).
- 815 42 Livesey, F. J., Furukawa, T., Steffen, M. A., Church, G. M. & Cepko, C. L.  
816 Microarray analysis of the transcriptional network controlled by the photoreceptor  
817 homeobox gene Crx. *Current biology : CB* **10**, 301-310 (2000).
- 818 43 Heinz, S. *et al.* Simple combinations of lineage-determining transcription factors  
819 prime cis-regulatory elements required for macrophage and B cell identities.  
820 *Molecular cell* **38**, 576-589, doi:10.1016/j.molcel.2010.05.004 (2010).

- 821 44 Whyte, W. A. *et al.* Master transcription factors and mediator establish super-  
822 enhancers at key cell identity genes. *Cell* **153**, 307-319,  
823 doi:10.1016/j.cell.2013.03.035 (2013).
- 824 45 Briata, P., Ilengo, C., Bobola, N. & Corte, G. Binding properties of the human  
825 homeodomain protein OTX2 to a DNA target sequence. *FEBS letters* **445**, 160-  
826 164 (1999).
- 827 46 Mouse, E. C. *et al.* An encyclopedia of mouse DNA elements (Mouse ENCODE).  
828 *Genome Biol* **13**, 418, doi:10.1186/gb-2012-13-8-418 (2012).
- 829 47 Emerson, M. M. & Cepko, C. L. Identification of a retina-specific Otx2 enhancer  
830 element active in immature developing photoreceptors. *Developmental biology*  
831 **360**, 241-255, doi:10.1016/j.ydbio.2011.09.012 (2011).
- 832 48 Billings, N. A., Emerson, M. M. & Cepko, C. L. Analysis of thyroid response  
833 element activity during retinal development. *PLoS One* **5**, e13739,  
834 doi:10.1371/journal.pone.0013739 (2010).
- 835 49 Matsuda, T. & Cepko, C. L. Electroporation and RNA interference in the rodent  
836 retina in vivo and in vitro. *Proceedings of the National Academy of Sciences of*  
837 *the United States of America* **101**, 16-22, doi:10.1073/pnas.2235688100 (2004).
- 838 50 Sapkota, D. & Mu, X. Onecut transcription factors in retinal development and  
839 maintenance. *Neural Regen Res* **10**, 899-900, doi:10.4103/1673-5374.158350  
840 (2015).
- 841 51 Roberts, M. R., Hendrickson, A., McGuire, C. R. & Reh, T. A. Retinoid X receptor  
842 (gamma) is necessary to establish the S-opsin gradient in cone photoreceptors of

- 843 the developing mouse retina. *Investigative ophthalmology & visual science* **46**,  
844 2897-2904, doi:10.1167/iovs.05-0093 (2005).
- 845 52 Visel, A., Minovitsky, S., Dubchak, I. & Pennacchio, L. A. VISTA Enhancer  
846 Browser--a database of tissue-specific human enhancers. *Nucleic acids research*  
847 **35**, D88-92, doi:10.1093/nar/gkl822 (2007).
- 848 53 Zentner, G. E. & Scacheri, P. C. The chromatin fingerprint of gene enhancer  
849 elements. *J Biol Chem* **287**, 30888-30896, doi:10.1074/jbc.R111.296491 (2012).
- 850 54 Wang, S., Sengel, C., Emerson, M. M. & Cepko, C. L. A gene regulatory network  
851 controls the binary fate decision of rod and bipolar cells in the vertebrate retina.  
852 *Developmental cell* **30**, 513-527, doi:10.1016/j.devcel.2014.07.018 (2014).
- 853 55 Rodgers, H. M., Belcastro, M., Sokolov, M. & Mathers, P. H. Embryonic markers  
854 of cone differentiation. *Mol Vis* **22**, 1455-1467 (2016).
- 855 56 de Melo, J., Peng, G. H., Chen, S. & Blackshaw, S. The Spalt family transcription  
856 factor Sall3 regulates the development of cone photoreceptors and retinal  
857 horizontal interneurons. *Development* **138**, 2325-2336, doi:10.1242/dev.061846  
858 (2011).
- 859 57 Chang, B. *et al.* Cone photoreceptor function loss-3, a novel mouse model of  
860 achromatopsia due to a mutation in Gnat2. *Investigative ophthalmology & visual*  
861 *science* **47**, 5017-5021, doi:10.1167/iovs.05-1468 (2006).
- 862 58 Li, X., Perissi, V., Liu, F., Rose, D. W. & Rosenfeld, M. G. Tissue-specific  
863 regulation of retinal and pituitary precursor cell proliferation. *Science* **297**, 1180-  
864 1183, doi:10.1126/science.1073263 (2002).



- 865 59 Montana, C. L. *et al.* Reprogramming of adult rod photoreceptors prevents retinal  
866 degeneration. *Proceedings of the National Academy of Sciences of the United*  
867 *States of America* **110**, 1732-1737, doi:10.1073/pnas.1214387110 (2013).
- 868 60 Anders, S., Pyl, P. T. & Huber, W. HTSeq--a Python framework to work with  
869 high-throughput sequencing data. *Bioinformatics* **31**, 166-169,  
870 doi:10.1093/bioinformatics/btu638 (2015).
- 871 61 Love, M. I., Huber, W. & Anders, S. Moderated estimation of fold change and  
872 dispersion for RNA-seq data with DESeq2. *Genome Biol* **15**, 550,  
873 doi:10.1186/s13059-014-0550-8 (2014).
- 874 62 Trapnell, C., Pachter, L. & Salzberg, S. L. TopHat: discovering splice junctions  
875 with RNA-Seq. *Bioinformatics* **25**, 1105-1111, doi:10.1093/bioinformatics/btp120  
876 (2009).
- 877 63 Falcon, S. & Gentleman, R. Using GOstats to test gene lists for GO term  
878 association. *Bioinformatics* **23**, 257-258, doi:10.1093/bioinformatics/btl567  
879 (2007).
- 880 64 Martin, M. Cutadapt removes adapter sequences from high-throughput  
881 sequencing reads. *2011* **17**, 3, doi:10.14806/ej.17.1.200 (2011).
- 882 65 Langmead, B. & Salzberg, S. L. Fast gapped-read alignment with Bowtie 2. *Nat*  
883 *Methods* **9**, 357-359, doi:10.1038/nmeth.1923 (2012).
- 884 66 Li, H. *et al.* The Sequence Alignment/Map format and SAMtools. *Bioinformatics*  
885 **25**, 2078-2079, doi:10.1093/bioinformatics/btp352 (2009).
- 886 67 Zhang, Y. *et al.* Model-based analysis of ChIP-Seq (MACS). *Genome Biol* **9**,  
887 R137, doi:10.1186/gb-2008-9-9-r137 (2008).

- 888 68 Cherry, T. J. *et al.* NeuroD factors regulate cell fate and neurite stratification in  
889 the developing retina. *J Neurosci* **31**, 7365-7379, doi:10.1523/JNEUROSCI.2555-  
890 10.2011 (2011).
- 891 69 Matsuda, T. & Cepko, C. L. Controlled expression of transgenes introduced by in  
892 vivo electroporation. *Proceedings of the National Academy of Sciences of the*  
893 *United States of America* **104**, 1027-1032, doi:10.1073/pnas.0610155104 (2007).
- 894 70 Montana, C. L., Myers, C. A. & Corbo, J. C. Quantifying the activity of cis-  
895 regulatory elements in the mouse retina by explant electroporation. *J Vis Exp*,  
896 doi:10.3791/2821 (2011).
- 897

**Figure 1: Transcriptional profiling identifies *Nrl*-dependent coding and non-coding RNAs**

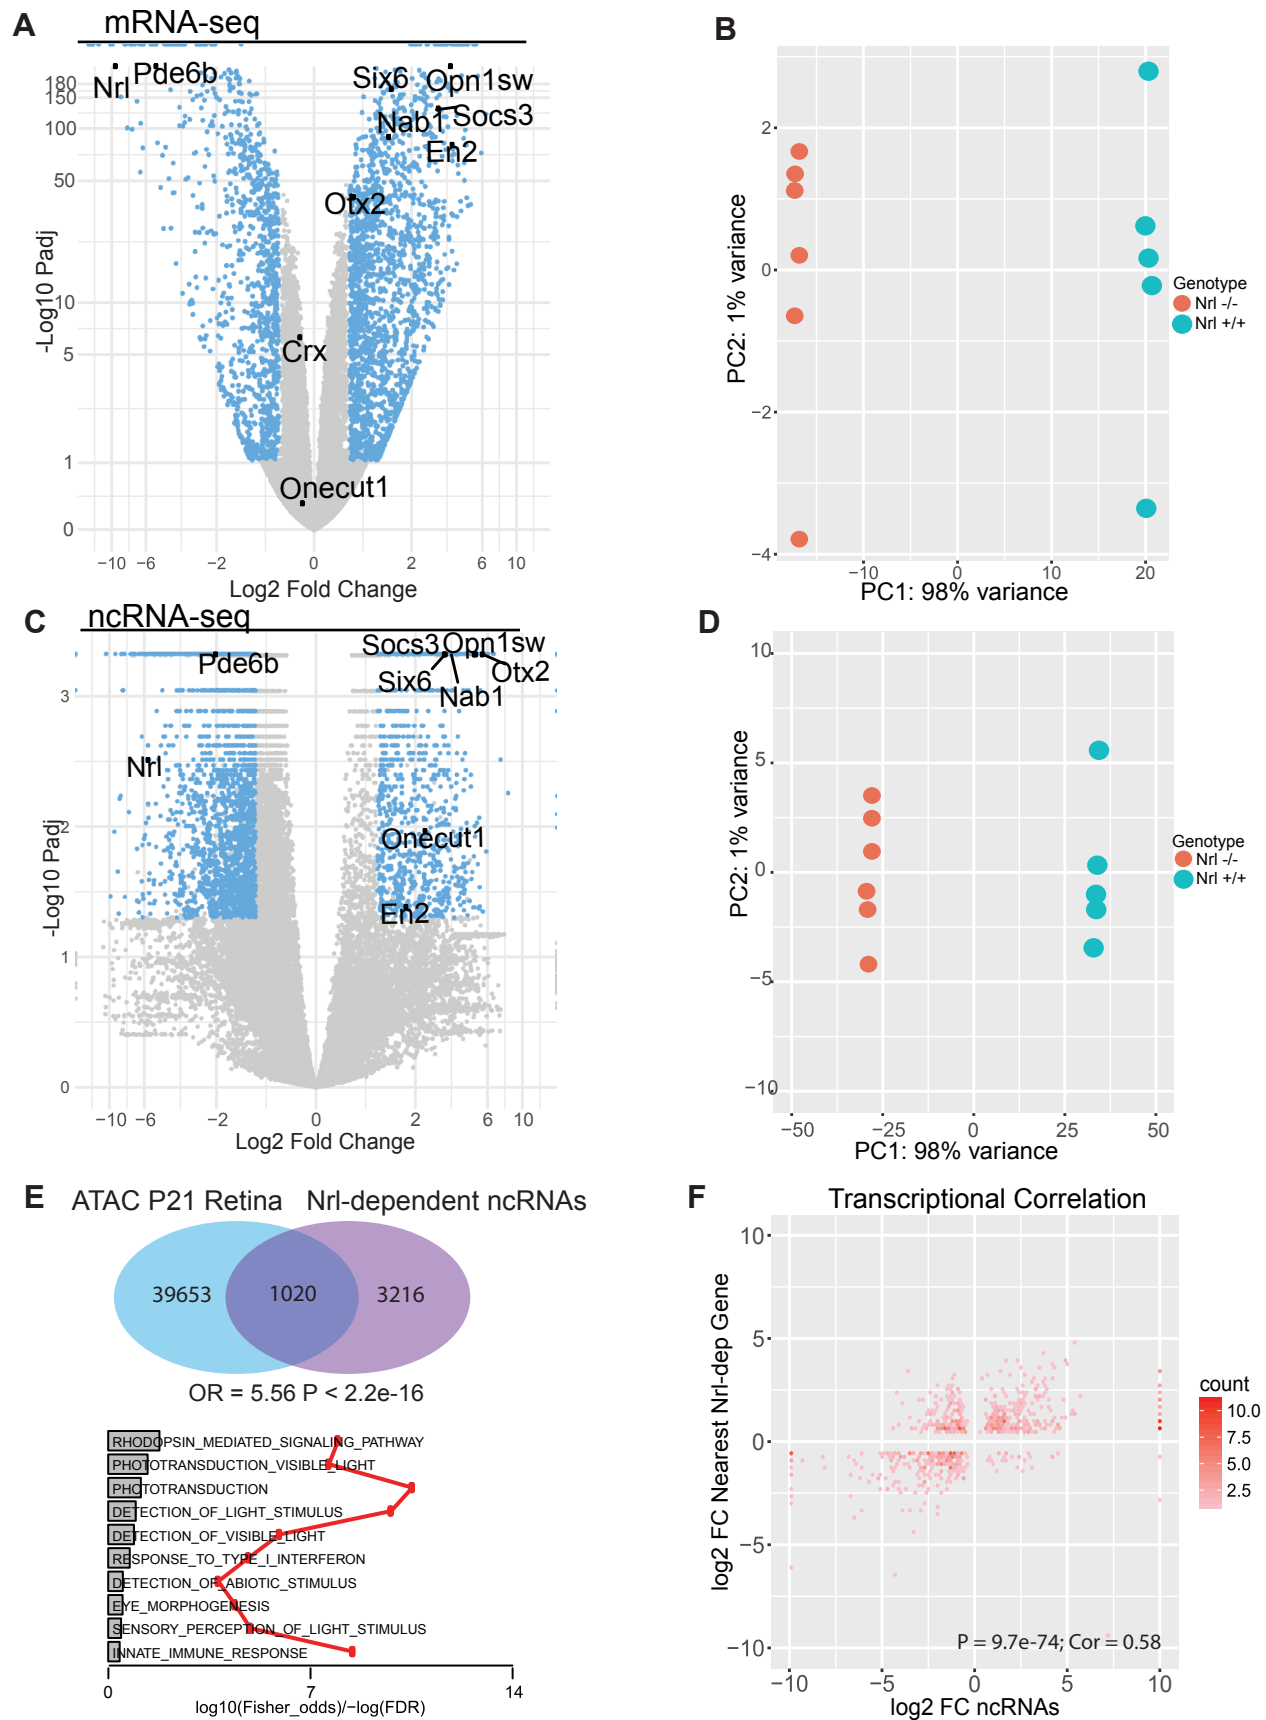

## Figure 2: *Nrl*-activated and repressed ncRNAs identify cell-type specific regulatory programs

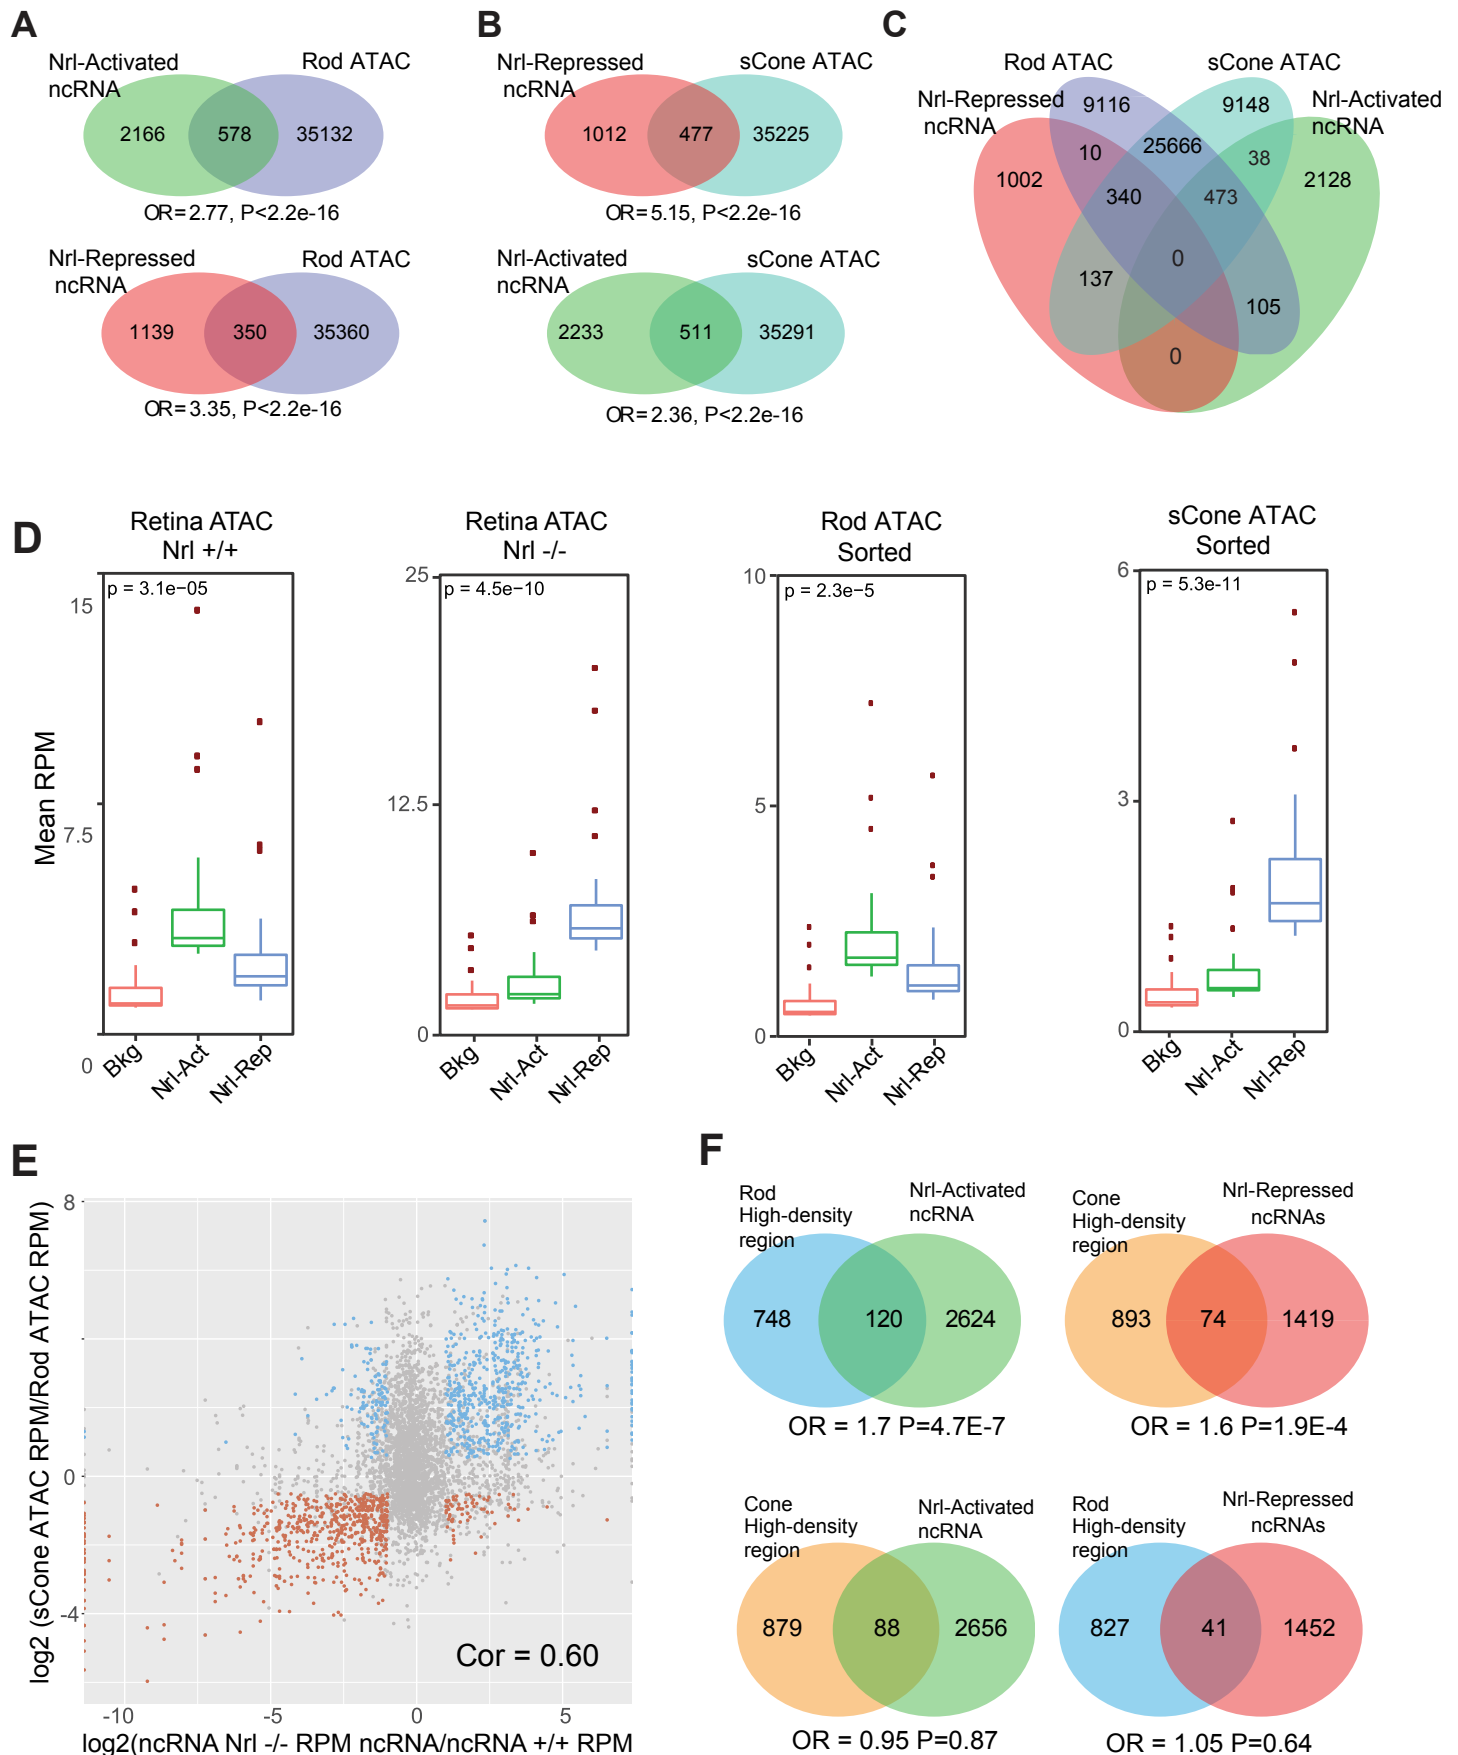

**Figure 3. *Nrl*-dependent ncRNAs define cell fate specific regulatory elements**

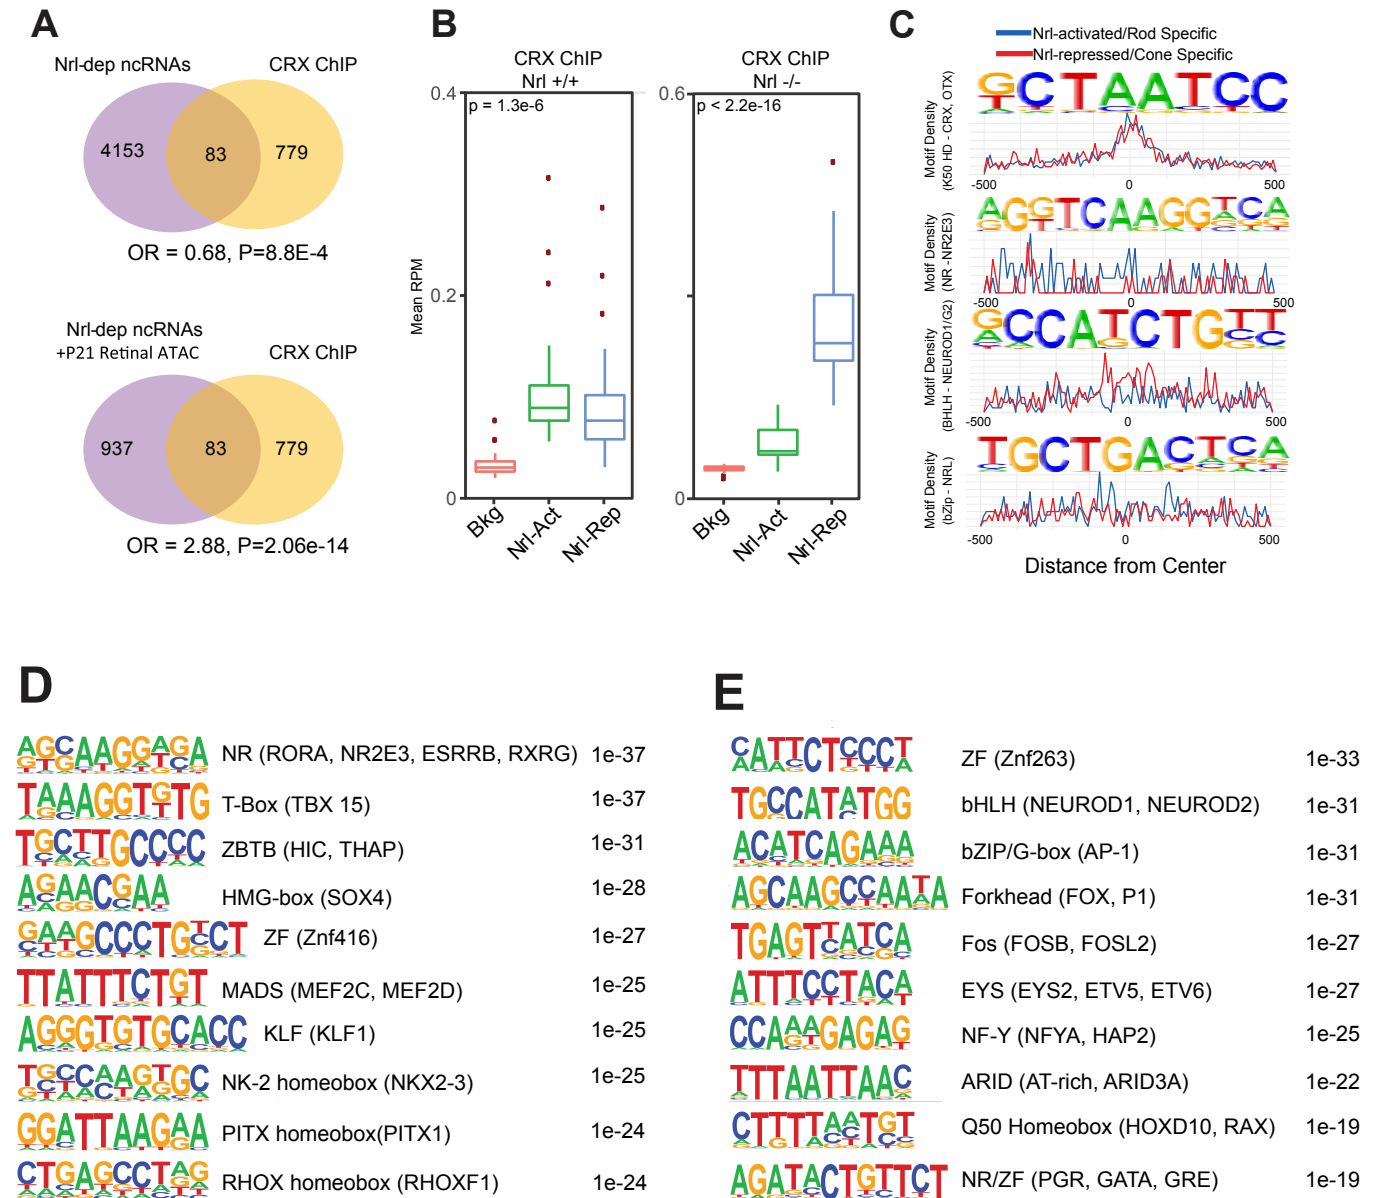

## Figure 4: *Nrl*-repressed ncRNAs identify cone-specific regulatory elements with regulatory activity *ex vivo*

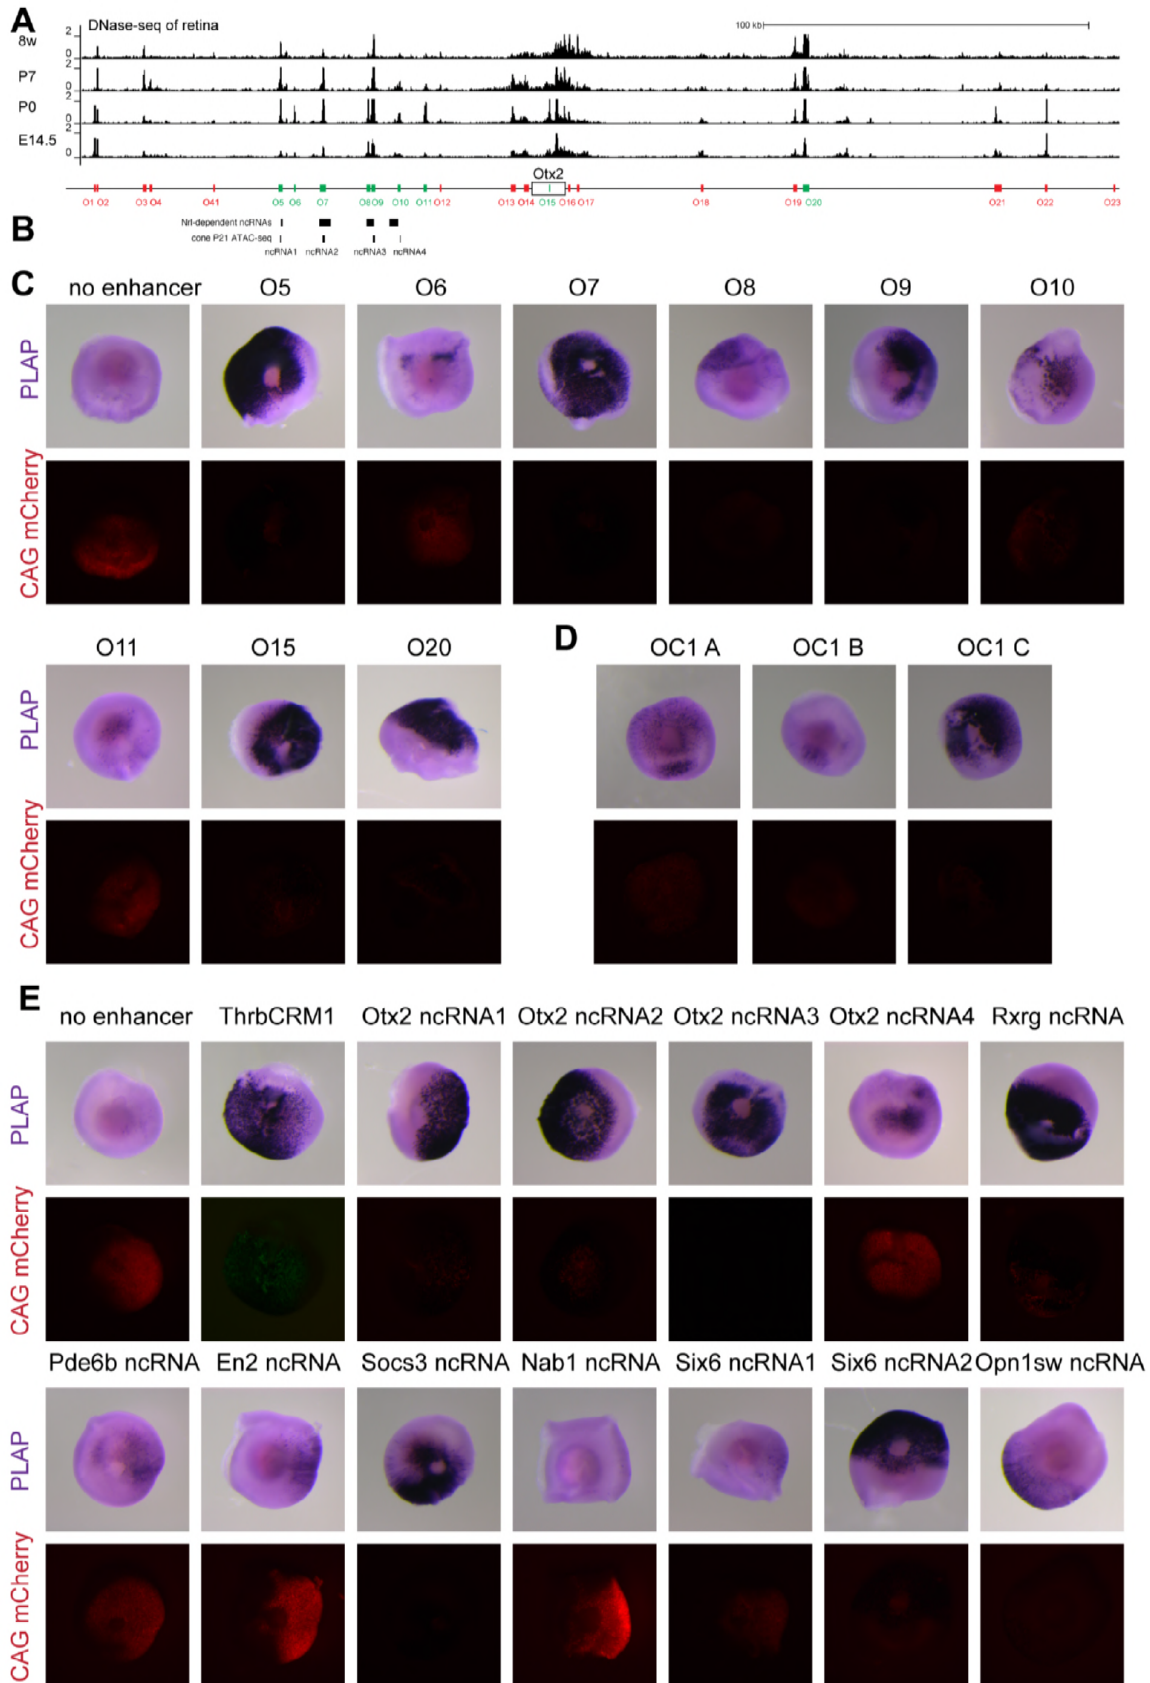



**Figure 5: *Nrl*-repressed ncRNAs identify functional cone-specific regulatory elements *in vivo***

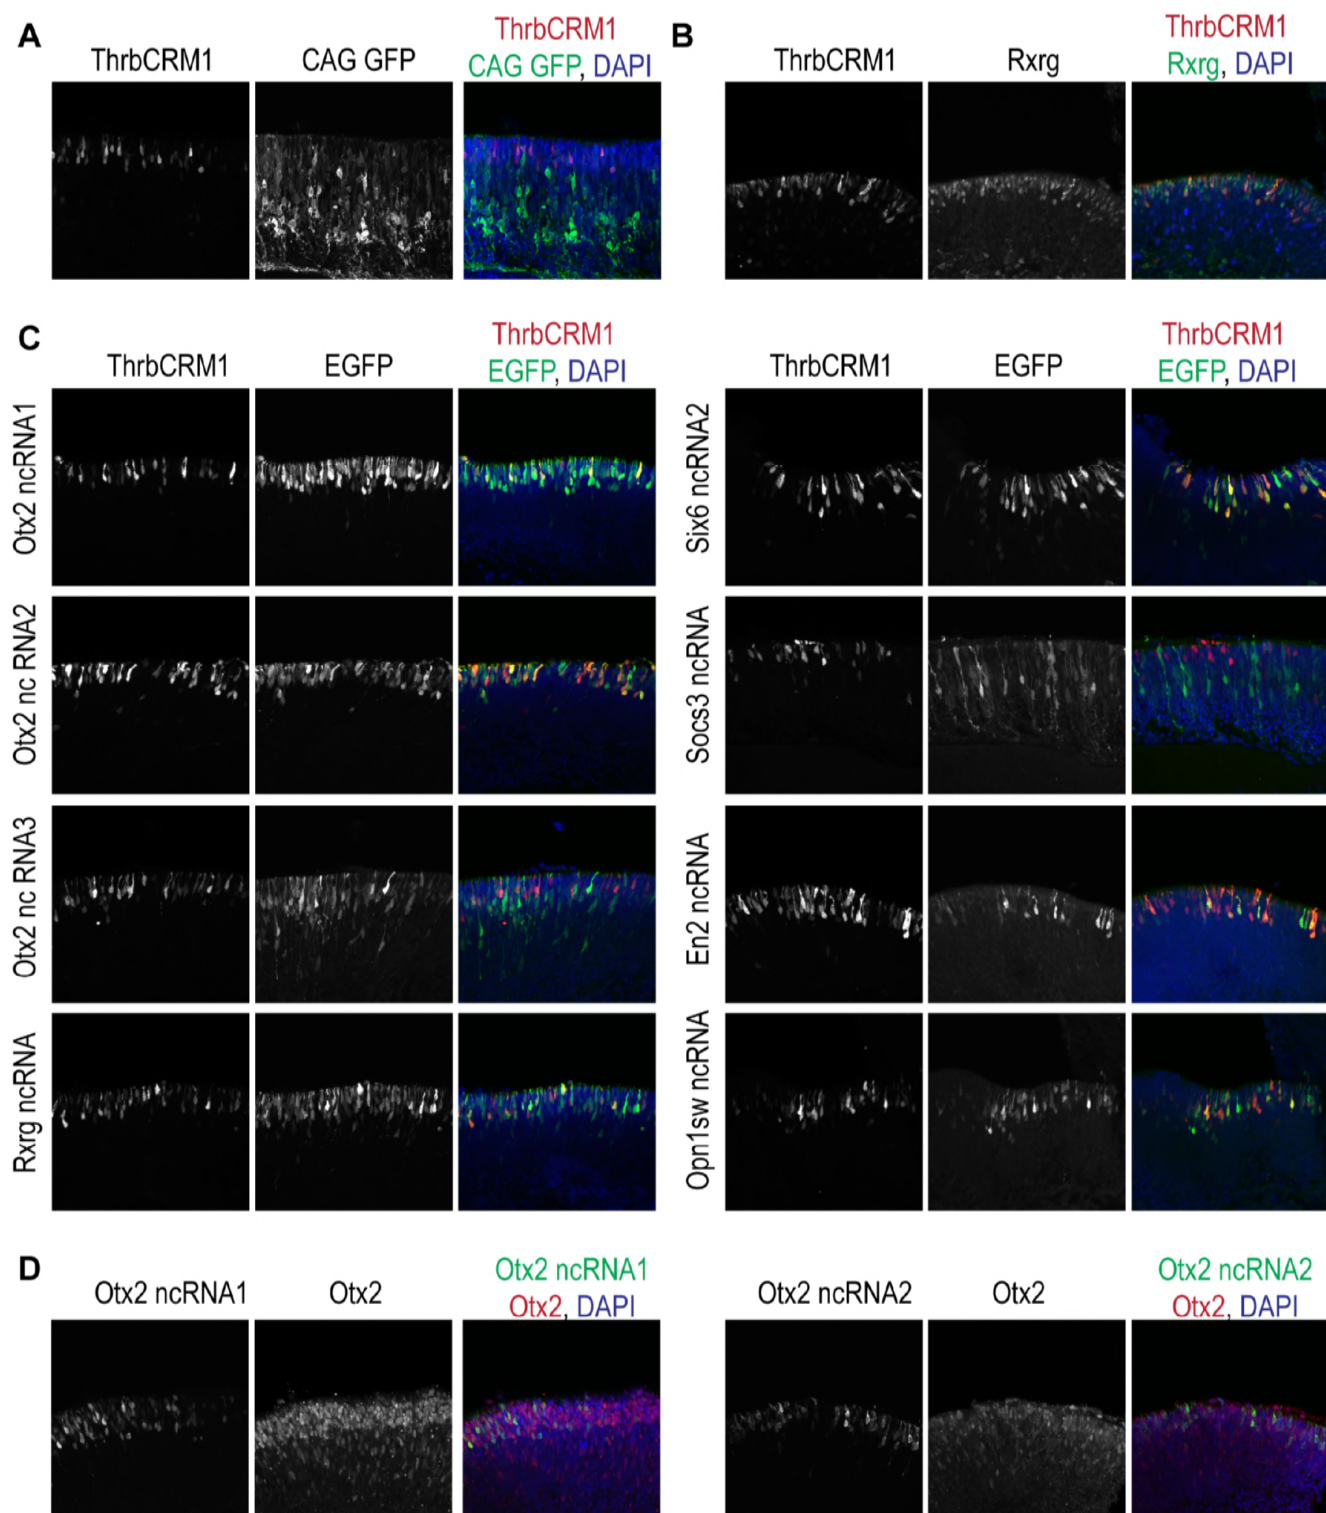

**Figure 1S. Processing pipelines for mRNA-seq, ncRNA-seq and ATAC-seq**

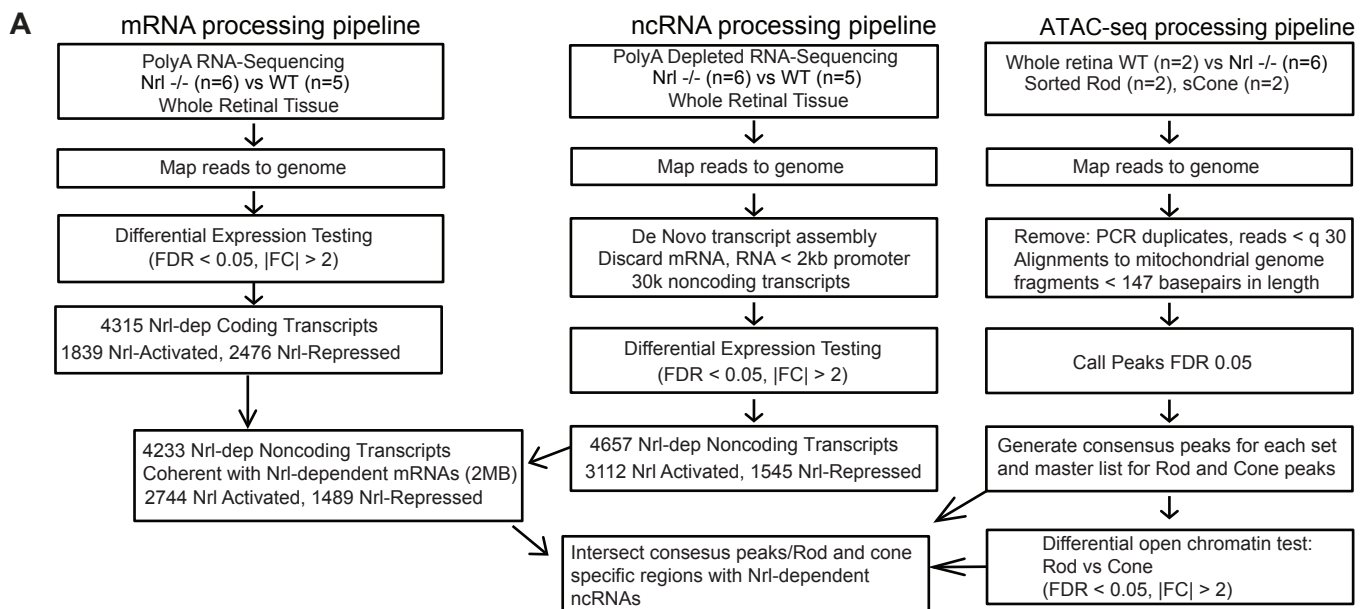

Source: https://biorxiv.org/content/biorxiv/early/2019/01/07/513598.full-text.pdf
